# Supplementary material
Source: PubMed Central journal article supplement (PMC7611214)

# Supplementary Data 1

for manuscript Rappez, Stadler et al.

Structural validation of  
metabolic markers by  
using LC-MS/MS

# Validation of markers detected in co-cultured HeLa and NIH3T3 cells

# Summary

| Molecular formula | Cell types      | METASPACE annotation                                                            | Validated using LC-MS/MS as | Validation method                                            | Summary of the MS/MS validation                                                                   |
|-------------------|-----------------|---------------------------------------------------------------------------------|-----------------------------|--------------------------------------------------------------|---------------------------------------------------------------------------------------------------|
| C40H76NO10P       | HeLa and NIH3T3 | PS(34:1)                                                                        | PS(16:0_18:1)               | Lipidomics (negative mode)                                   | <b>SL:</b> Progenesis <i>in-silico</i> Lipid library<br><b>HD:</b> PS<br><b>SD:</b> 18:1 16:0 FA  |
| C42H80NO10P       | HeLa and NIH3T3 | PS(36:1)                                                                        | PS(17:0_19:1)               | Lipidomics (negative mode)                                   | <b>SL:</b> Progenesis <i>in-silico</i> Lipid library<br><b>HD:</b> PS<br><b>SD:</b> 17:0 19:1 FA  |
| C18H36O2          | HeLa and NIH3T3 | Stearic acid, hexyl dodecanoate, 16-methylheptadecanoic acid, hexyl dodecanoate | FA(18:0)                    | Lipidomics (negative mode)                                   | <b>Standard:</b> Stearic acid (Sigma EC10A)                                                       |
| C43H81O13P        | HeLa and NIH3T3 | PI(34:1)                                                                        | PI(16:0_18:1)               | Lipidomics (negative mode)                                   | <b>SL:</b> Progenesis <i>in-silico</i> Lipid library<br><b>HD:</b> PI<br><b>SD:</b> 16:0, 18:1 FA |
| C45H78NO8P        | HeLa and NIH3T3 | PE(40:6), PC(37:6)                                                              | PE(18:0_22:6)               | Lipidomics (positive mode) →<br>Lipidomics (negative mode) → | <b>HD:</b> PE<br><b>SD:</b> 18:0, 22:6 FA                                                         |

**SL:** MS/MS spectral library  
**HD:** Head group MS/MS  
**SD:** Fatty acid (FA) side chain

**METASPACE** annotation: C<sub>40</sub>H<sub>76</sub>NO<sub>10</sub>P, -H, m/z 760.5134, PS(34:1)

**Database used** : Progenesis in-silico Lipid library

**Validated as** : PS(16:0\_18:1) using LC-MS/MS method **Lipidomics** (negative mode)

*Progenesis library in silico fragmentation match*

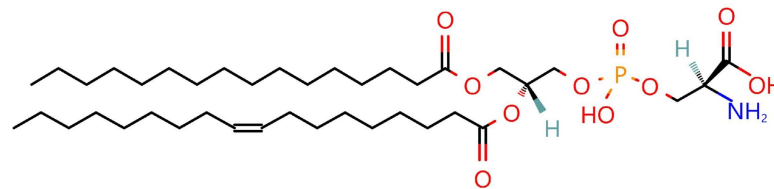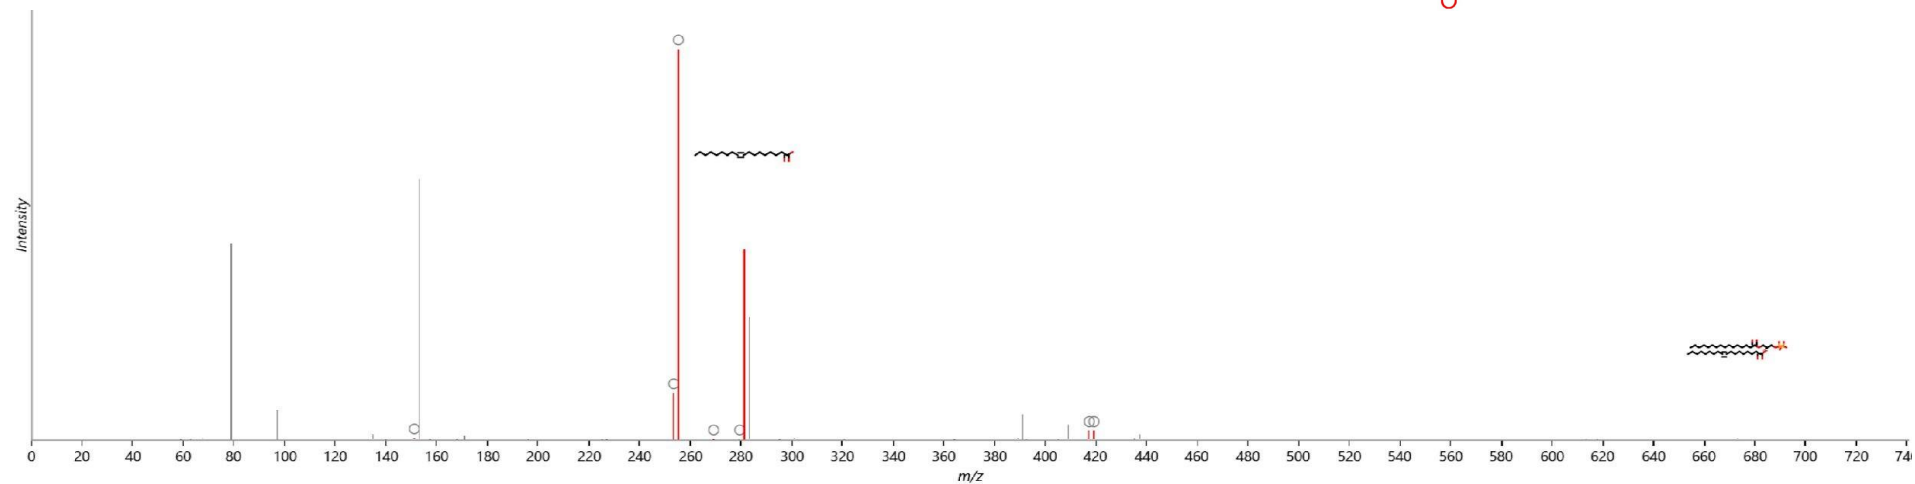

Legend: ■ Matched fragment ■ Unmatched fragment

**METASPACE** annotation: C42H80NO10P, -H, m/z 788.5447, PS(36:1)

**Database used** : Progenesis in-silico Lipid library

**Validated as** : PS(17:0\_19:1) using LC-MS/MS method **Lipidomics** (negative mode)

*Progenesis library in silico fragmentation match*

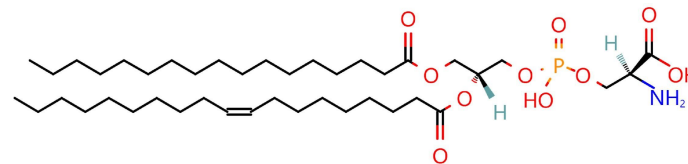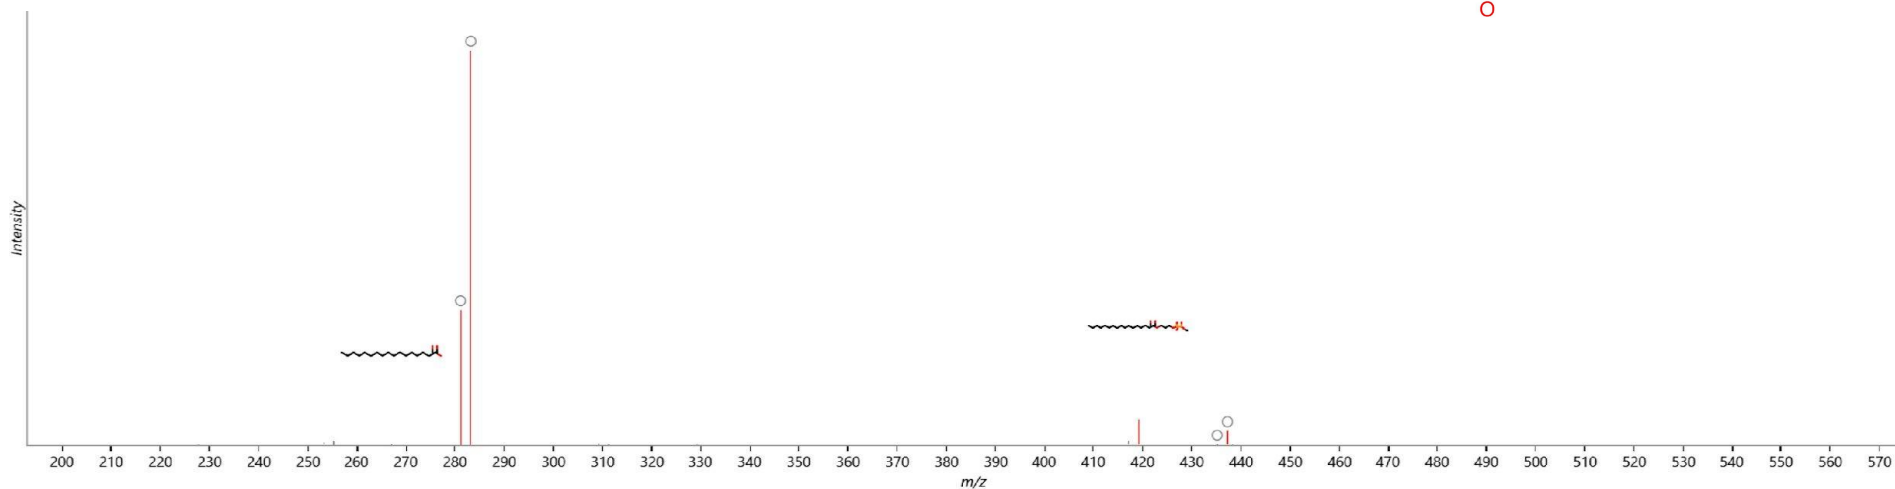

# METASPACE annotation: C18H36O2, -H, m/z 283.2642, Stearic acid or another isomeric FA(18:0)

Standard used : Stearic acid (Sigma EC10A)

Validated as : Stearic acid using LC-MS/MS method Lipidomics (negative mode)

RT match with  
standard

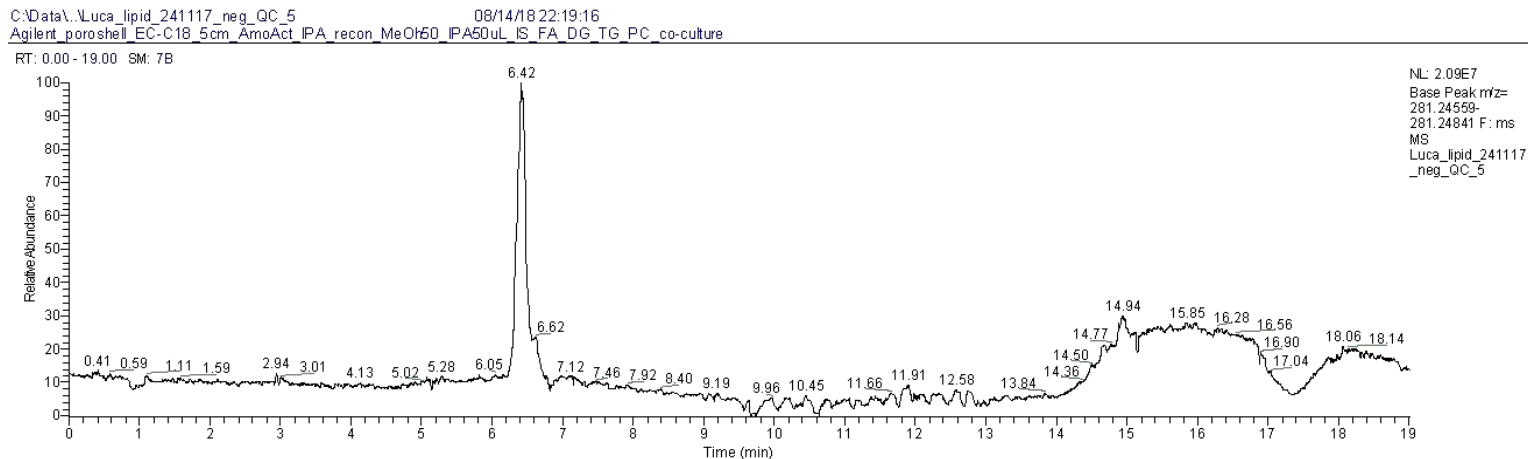

Luca\_lipid\_241117\_neg\_QC\_5 #2730 RT: 6.40 AV: 1 NL: 3.75E8  
T: FTMS - p ESI Full ms [100.0000-1500.0000]

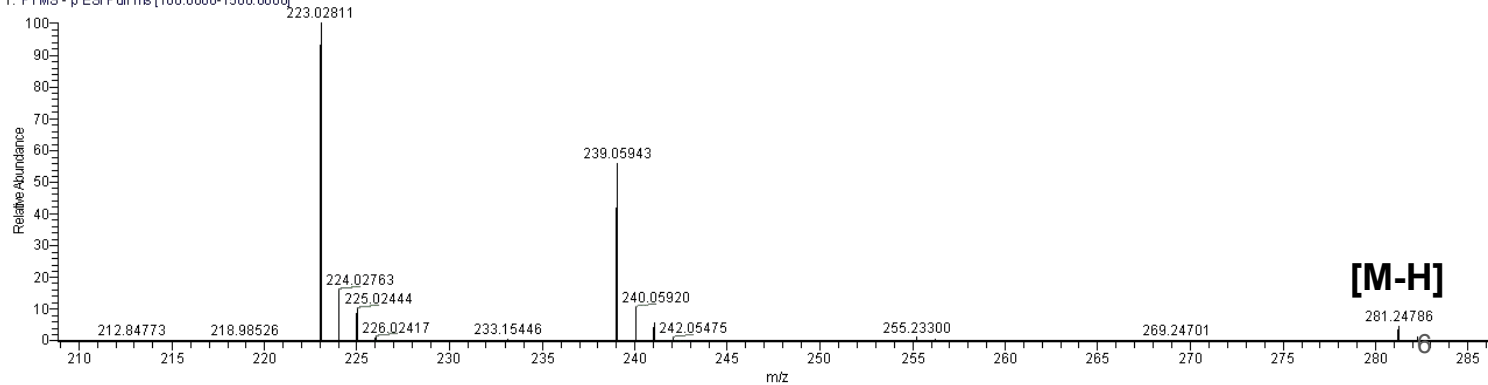

**METASPACE annotation:** C43H81O13P, -H, m/z 835.5342, PI(34:1)

**Database used** : Progenesis in-silico Lipid library

**Validated as** : PI(18:1\_16:1) using LC-MS/MS method Lipidomics (negative mode)

### Progenesis *in silico* Lipid library

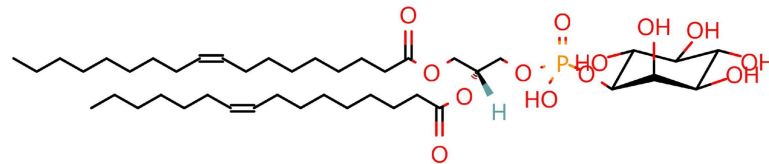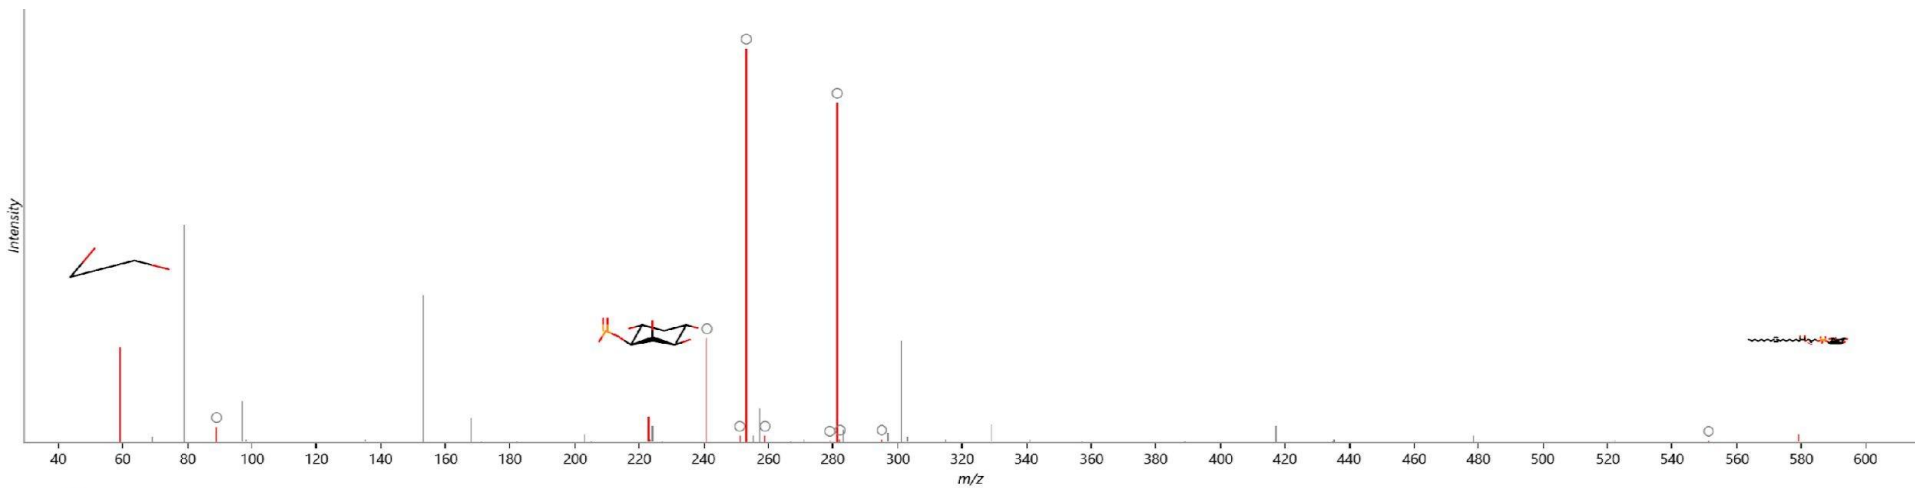

**METASPACE annotation: C45H78NO8P, +H, m/z 792.55433, PE(40:6) or PC(37:6)**

**Validated as : PE(40:6) using LC-MS/MS method Lipidomics (positive mode)**

Luca140818\_lipid\_Pos\_co\_culture\_1 #5723 RT: 12.65 AV: 1 NL: 1.82E6  
F: FTMS + p ESI d Full ms2 792.7021@hcd40.00 [55.0000-825.0000]

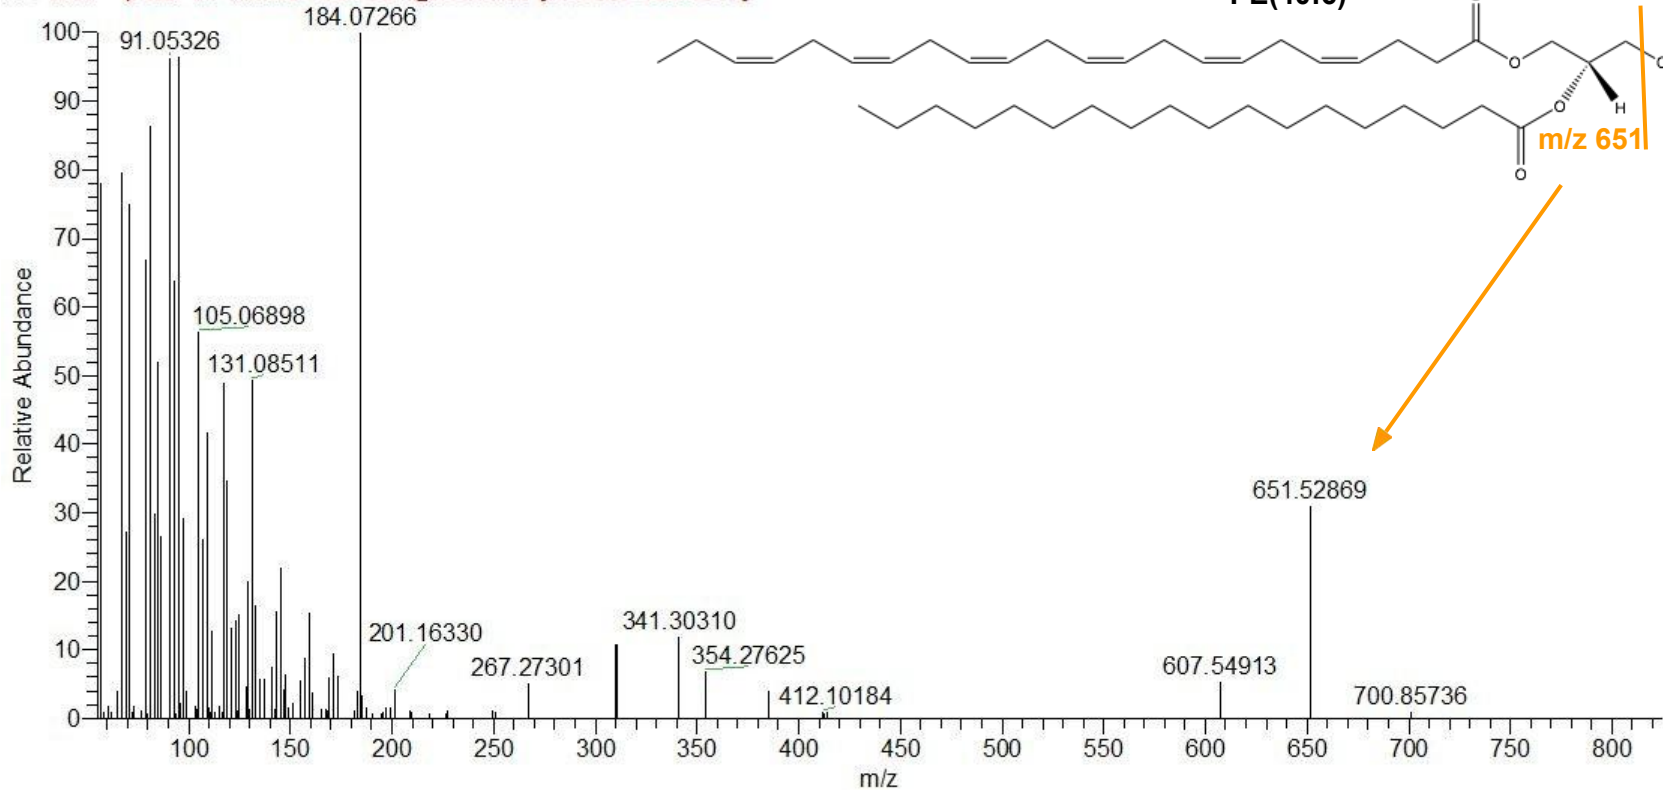



# METASPACE annotation: C<sub>45</sub>H<sub>78</sub>NO<sub>8</sub>P, -H, m/z 790.5386, PE(40:6) or PC(37:6)

Validated as : PE(18:0\_22:6) using LC-MS/MS method Lipidomics (negative mode)

Luca140818\_lipid\_Neg\_co\_culture\_1 #4783 RT: 11.10 AV: 1 NL: 2.76E6  
F: FTMS - p ESI d Full ms2 790.5344@hcd40.00 [55.0000-825.0000]

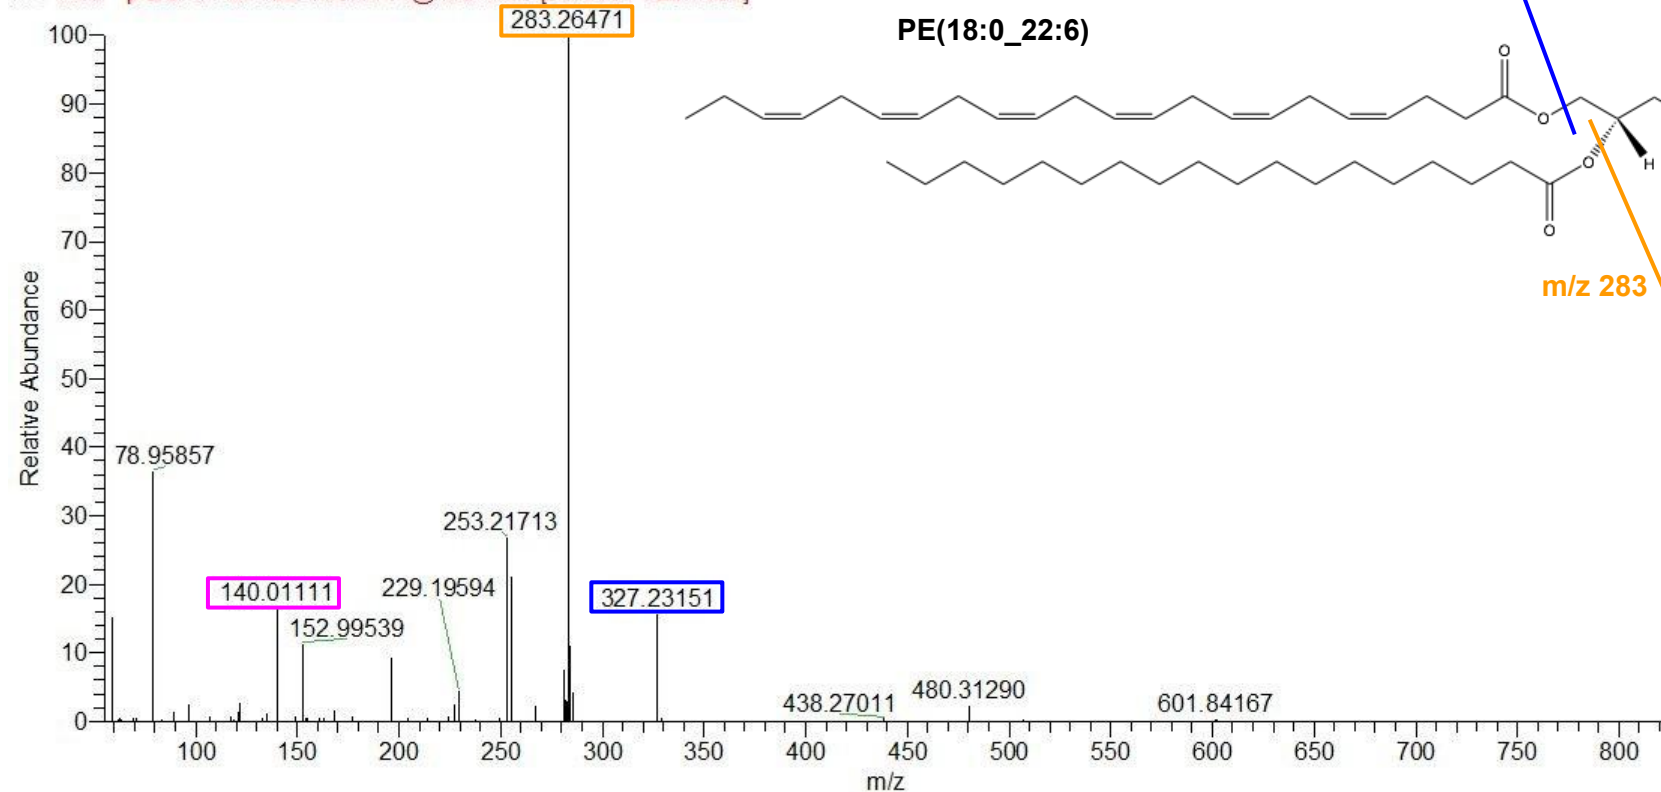

# Absence of PC(37:6) and detection of PE(40:6) in the negative mode

Luca140818\_lipid\_Neg\_co\_culture\_1 08/15/18 00:38:18  
Agilent\_poroshell\_EC-C18\_5cm\_AmoAct\_IPA\_recon\_MeOH50\_IPA50ul\_IS\_FA\_DG\_TG\_PC\_co\_culture  
RT: 0.00 - 19.00 SM: 3B

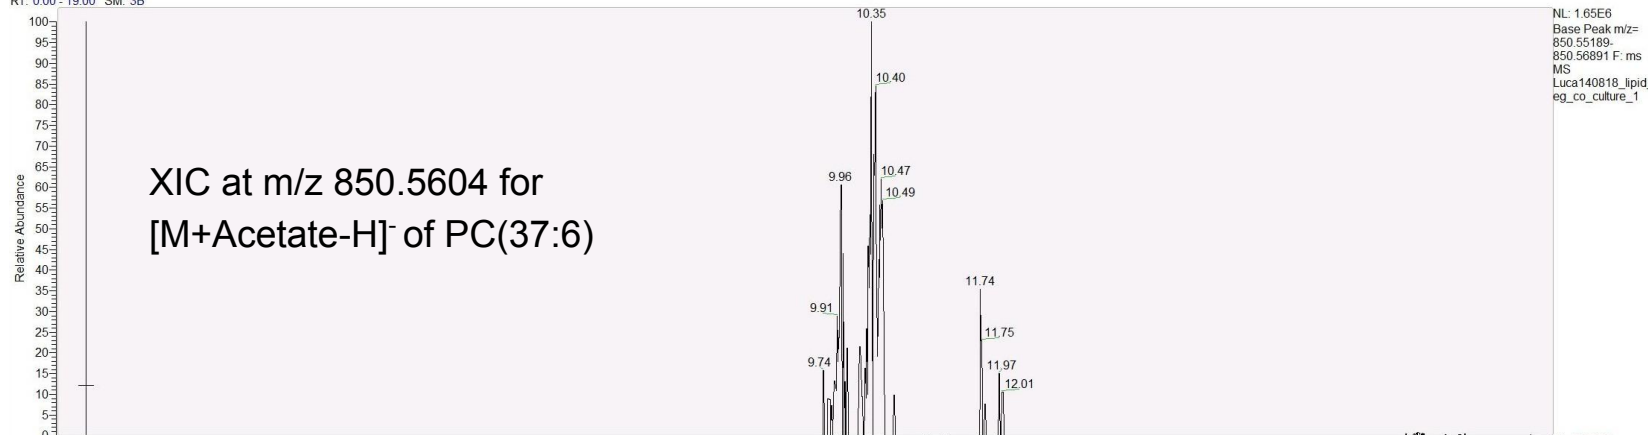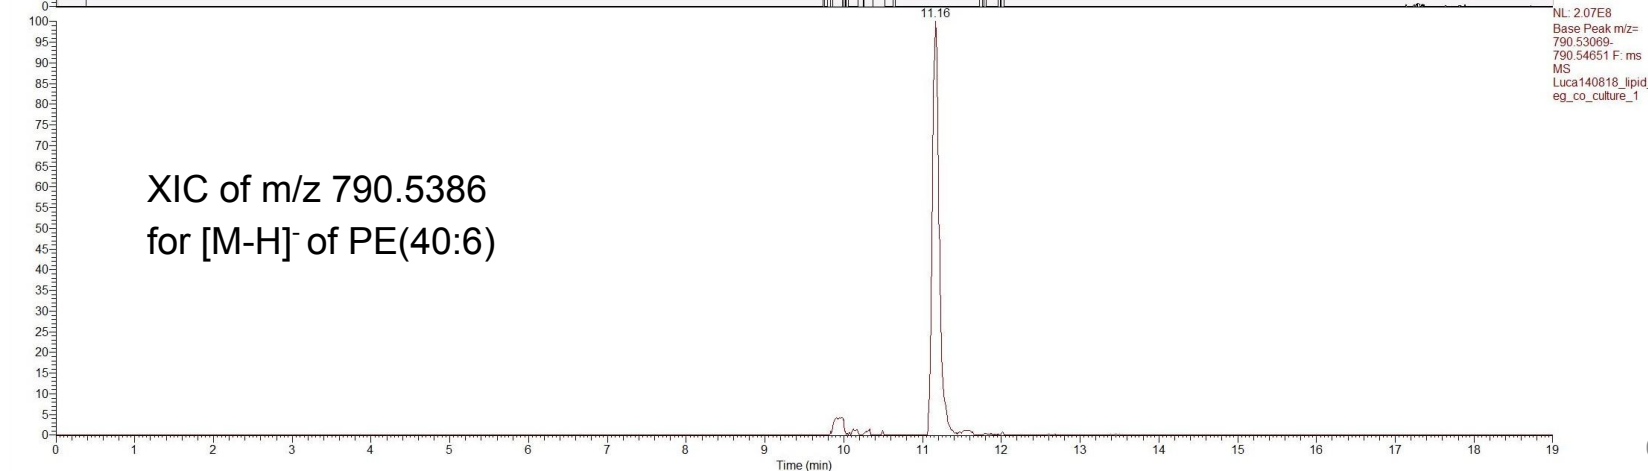

# Possible co-elution of PE(40:6) with a phosphatidylcholine (PC)

Luca140818\_lipid\_Pos\_co\_culture\_1 08/15/18 18:57:38  
Agilent\_poroshell\_EC-C18\_5cm\_AmoAct\_IPA\_recon\_MeOH50\_IPA50uL\_IS\_FA\_DG\_TG\_PC\_co-culture\_newESneedle

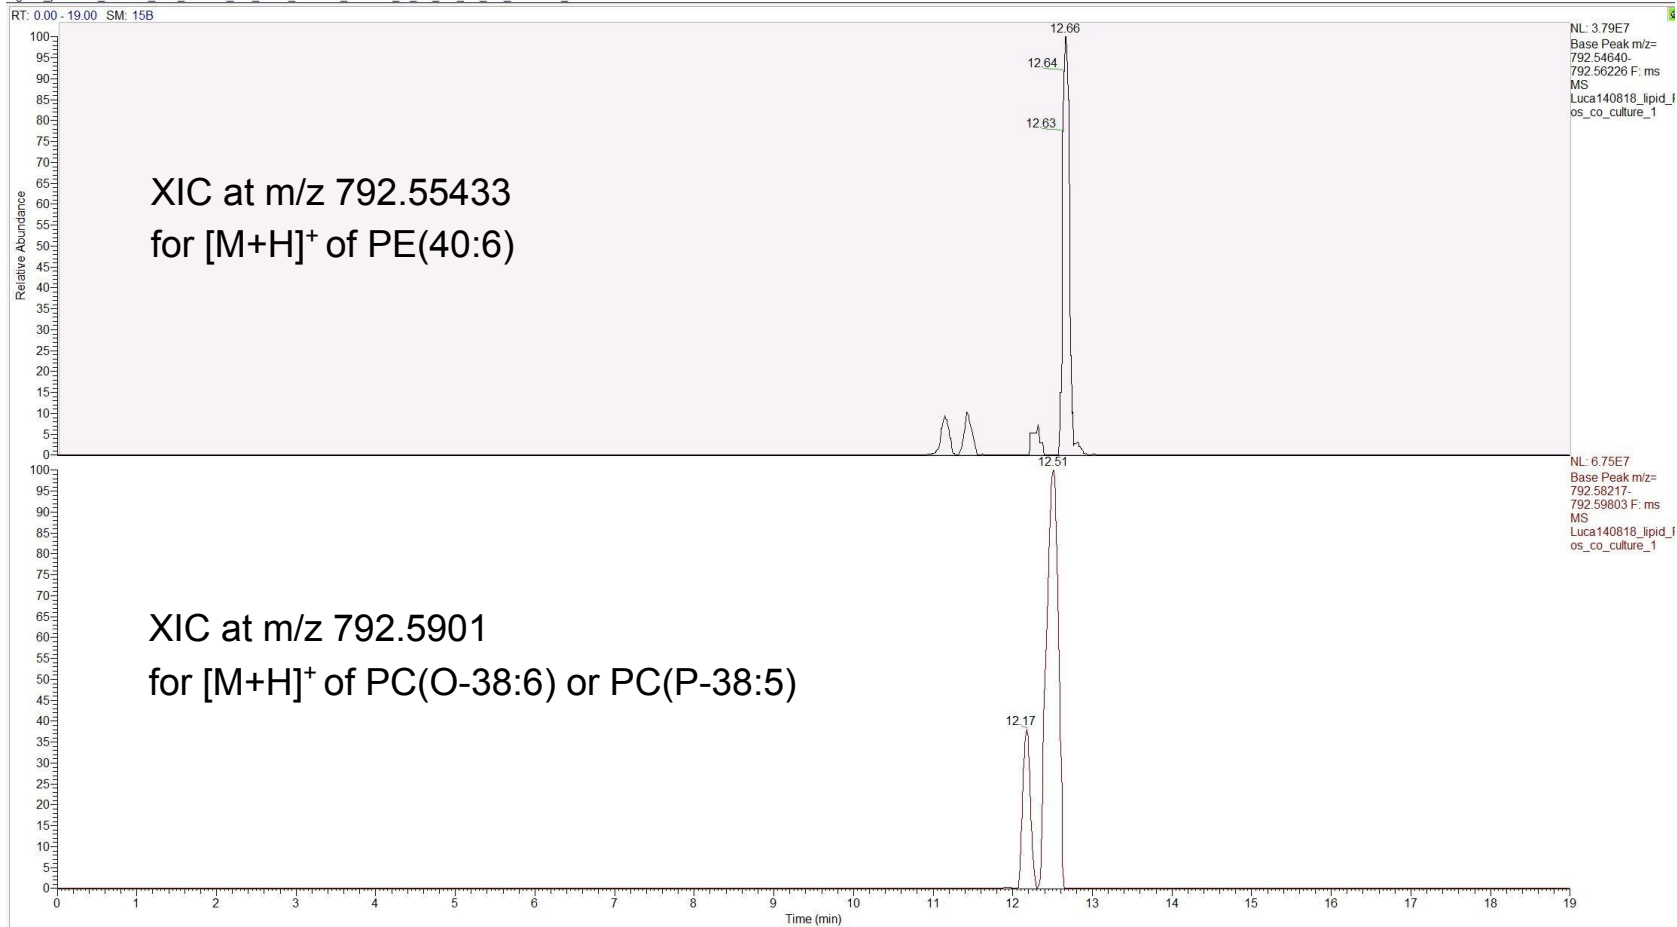

# Validation of markers detected in dHepaRG hepatocytes

# Summary

| Molecular formula | Cell type | METASPACE annotation | Validated using LC-MS/MS as | Validation method          | Summary of the MS/MS validation                                                     |
|-------------------|-----------|----------------------|-----------------------------|----------------------------|-------------------------------------------------------------------------------------|
| C53H100O6         | dHepaRG   | TG(50:1)             | TG(16:0_18:1_16:0)          | Lipidomics (positive mode) | <b>SL:</b> Progenesis <i>in-silico</i> spectral library<br><b>SD:</b> 16:0, 18:1 FA |
| C55H102O6         | dHepaRG   | TG(52:2)             | TG(16:0_18:1_18:1)          | Lipidomics (positive mode) | <b>SL:</b> Progenesis <i>in-silico</i> spectral library<br><b>SD:</b> 16:0, 18:1 FA |

**SL:** MS/MS spectral library  
**SD:** Fatty acid (FA) side chain

Validating TG(50:1) as TG(16:0\_18:1\_16:0)

# Validating detection in cell extract by LCMS

C:\Data\Luca\_lipid\_241117\_Pos\_QC\_5 08/15/18 16:38:36  
Agilent\_poroshell\_EC-C18\_5cm\_AmoAct\_IPA\_recon\_MeOH50\_IPA50uL\_IS\_FA\_DG\_TG\_PC\_co-culture\_newESneedle

RT: 0.00 - 19.00 SM: 7B

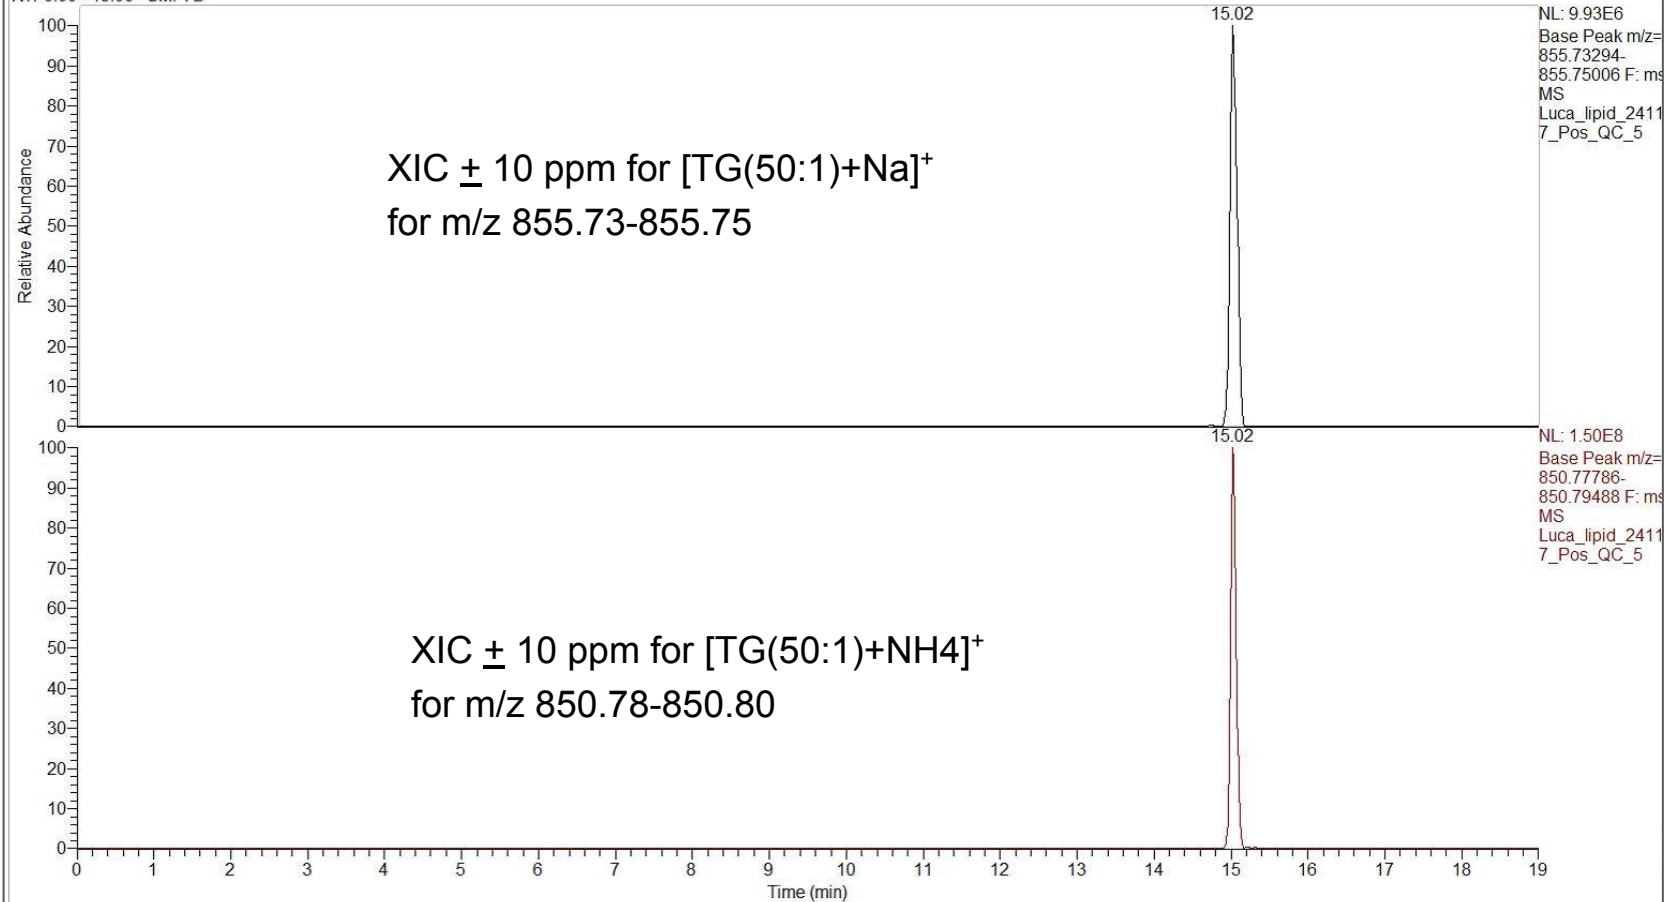

# Finding the lipid class by exact m/z search on HMDB

## Parameters:

- <https://hmdb.ca/spectra/ms/search>
- Considering the following adducts which are possible in the LCMS positive method:
  - +H, +H-2H<sub>2</sub>O, +H-H<sub>2</sub>O, +NH<sub>4</sub>-H<sub>2</sub>O, +NH<sub>4</sub>, +Na, +CH<sub>2</sub>OH+H
- With 10 ppm tolerance

## Results:

- For 855.74 (corresponding to [TG(50:1)+Na]<sup>+</sup>): **137 hits, 135 of them TGs**
- For 850.785 (corresponding to [TG(50:1)+NH<sub>4</sub>]<sup>+</sup>): **33 hits, all of them TGs, all [TG(50:1)+NH<sub>4</sub>]<sup>+</sup>**



# Identifying fatty acyl chains of TG(50:1) for +Na

**METASPACE annotation:** C<sub>53</sub>H<sub>100</sub>O<sub>6</sub>, +Na, m/z 855.7412, TG(50:1)

**Database used** : LipidBlast search (in Progenesis software)

**Validated as** : TG(16:0\_18:1\_16:0) using LC-MS/MS method Lipidomics (positive mode)

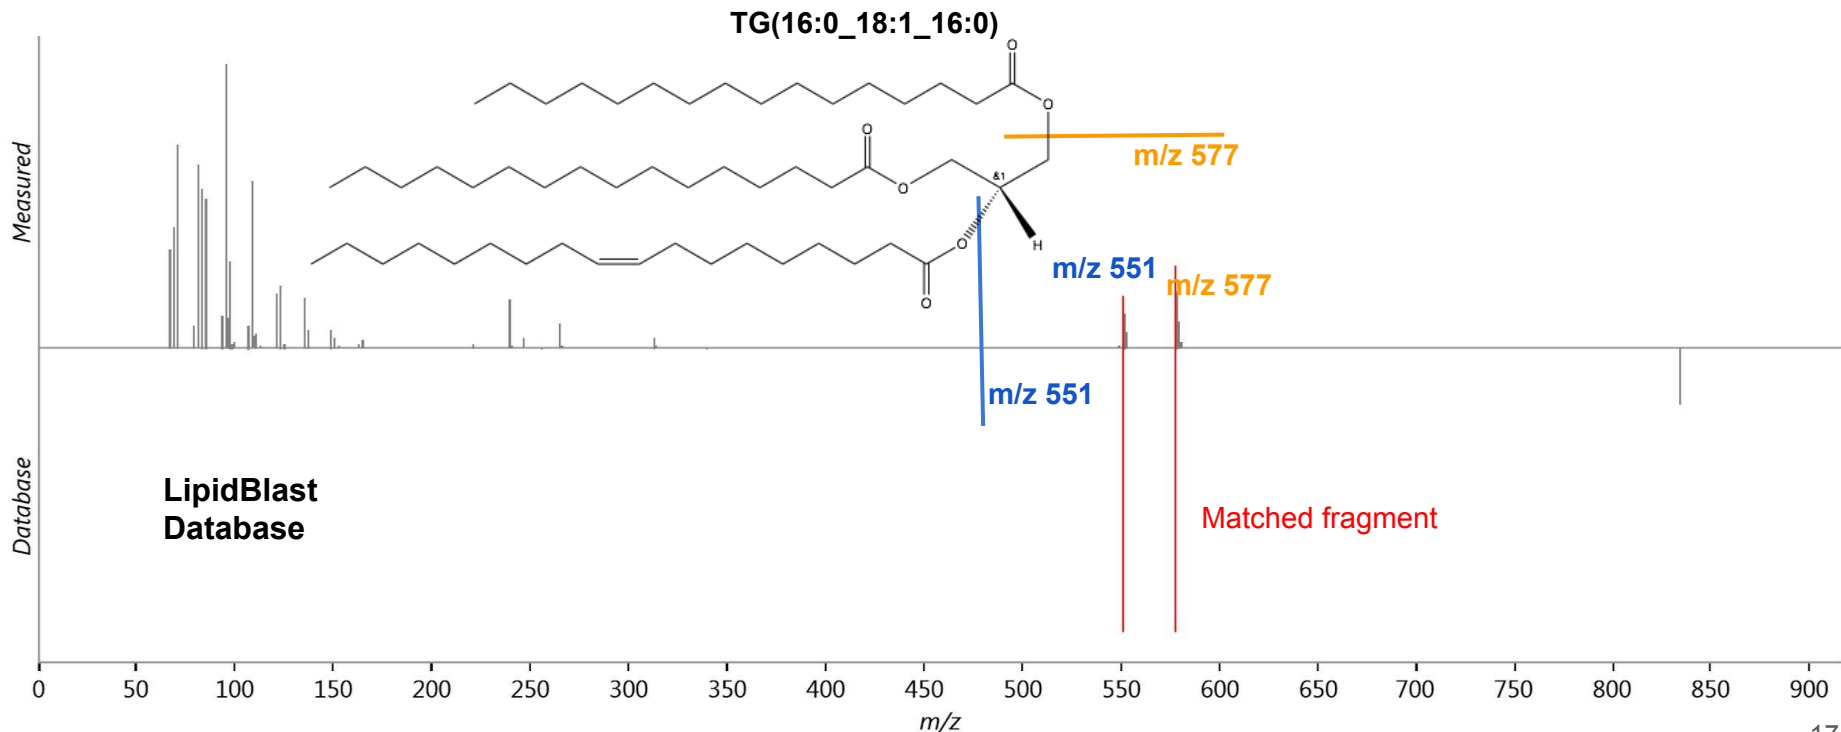

# Identifying fatty acyl chains of TG(50:1) for +NH4

Luca\_lipid\_241117\_Pos\_QC\_5\_#7099 RT: 15.20 AV: 1 NL: 2.23E5  
F: FTMS + p ESI d Full ms2 850.6609@hcd40.00 [59.0000-885.0000]

**METASPACE annotation: C53H100O6, +NH4, m/z 850.7863, TG(50:1)**

**Database used** : LipidBlast search (in Progenesis software)

**Validated as** : TG(16:0\_18:1\_16:0) using LC-MS/MS method Lipidomics (positive mode)

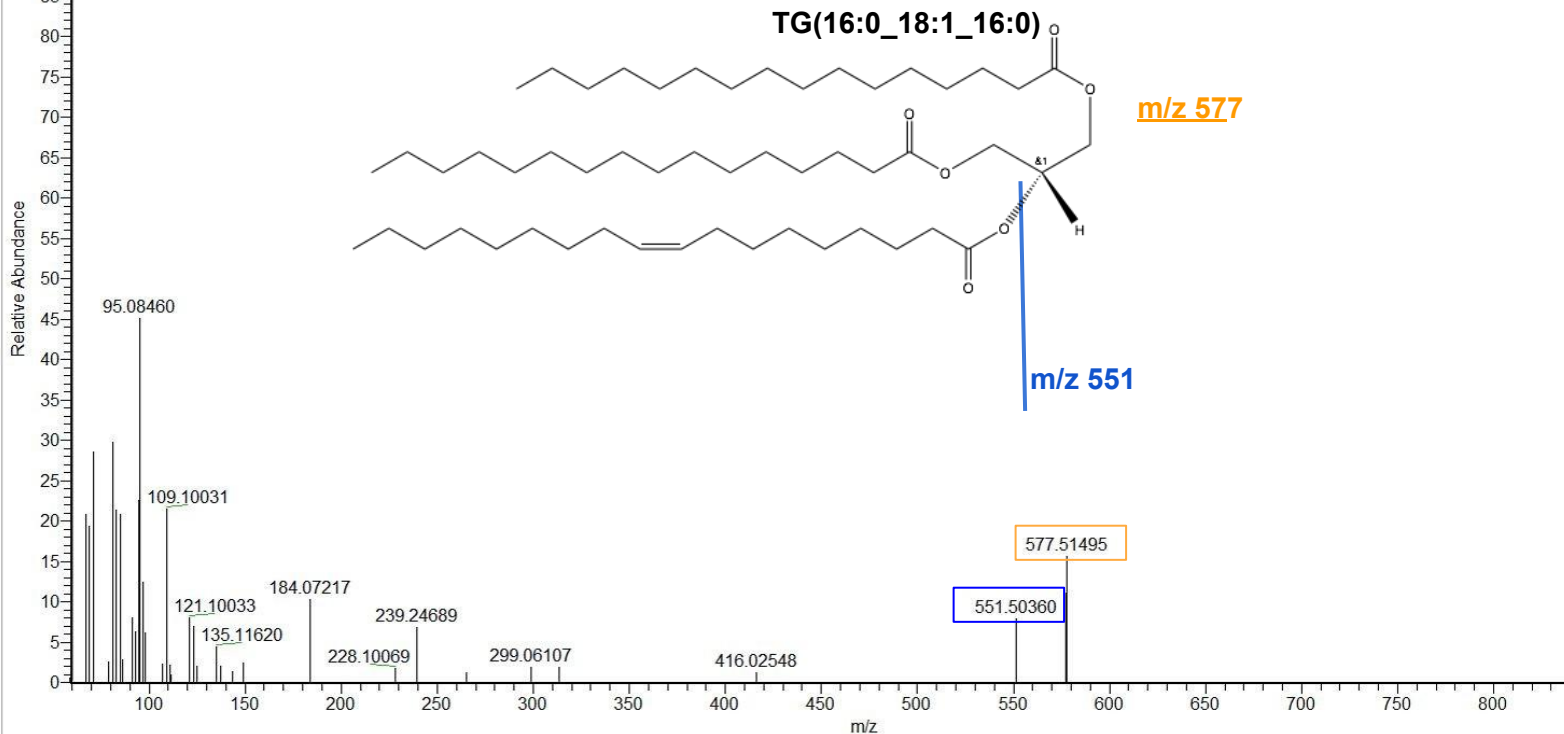

Validating TG(52:2) as TG(16:0\_18:1\_18:1)

# Validating detection in cell extract by LCMS

C:\Data\..Luca\_lipid\_241117\_Pos\_QC\_5 08/15/18 16:38:36  
Agilent\_poroshell\_EC-C18\_5cm\_AmoAct\_IPA\_recon\_MeOH50\_IPA50uL\_IS\_FA\_DG\_TG\_PC\_co-culture\_newESIneedle

RT: 0.00 - 19.00 SM: 7B

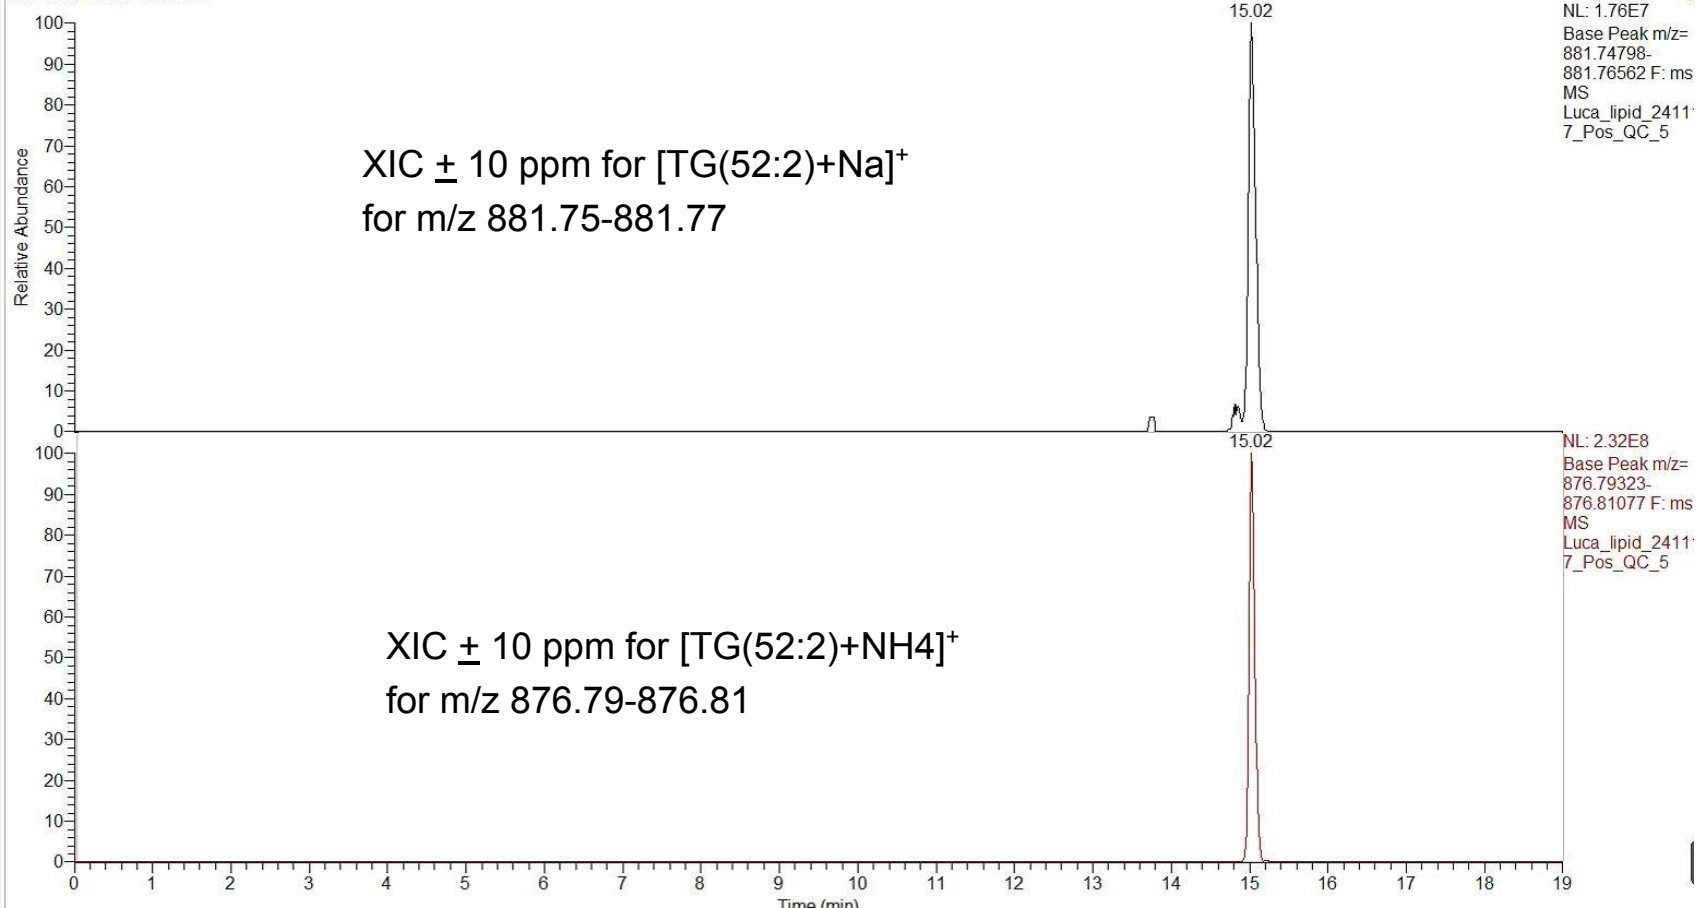

# Finding the lipid class by exact m/z search on HMDB

## Parameters:

- <https://hmdb.ca/spectra/ms/search>
- Considering the following adducts which are possible in the LCMS positive method:
  - +H, +H-2H<sub>2</sub>O, +H-H<sub>2</sub>O, +NH<sub>4</sub>-H<sub>2</sub>O, +NH<sub>4</sub>, +Na, +CH<sub>2</sub>OH+H
- With 10 ppm tolerance

## Results:

- For 881.76 (corresponding to [TG(52:2)+Na]<sup>+</sup>): **229 hits, all of them TGs, either +Na or +H (the latter not possible for TGs)**
- For 876.8 (corresponding to [TG(52:2)+NH<sub>4</sub>]<sup>+</sup>): **65 hits, all of them TGs, all [TG(52:2)+NH<sub>4</sub>]<sup>+</sup>**

# Identifying fatty acyl chains of TG(52:2) for +Na

**METASPACE annotation:** C<sub>55</sub>H<sub>102</sub>O<sub>6</sub>, +Na, m/z 881.7568, TG(52:2)

**Database used** : EMBL-MCF spectral library and LipidBlast search (in Progenesis software)

**Validated as** : TG(16:0\_18:1\_18:1) using LC-MS/MS method Lipidomics (positive mode)

**TG(16:0\_18:1\_18:1)**

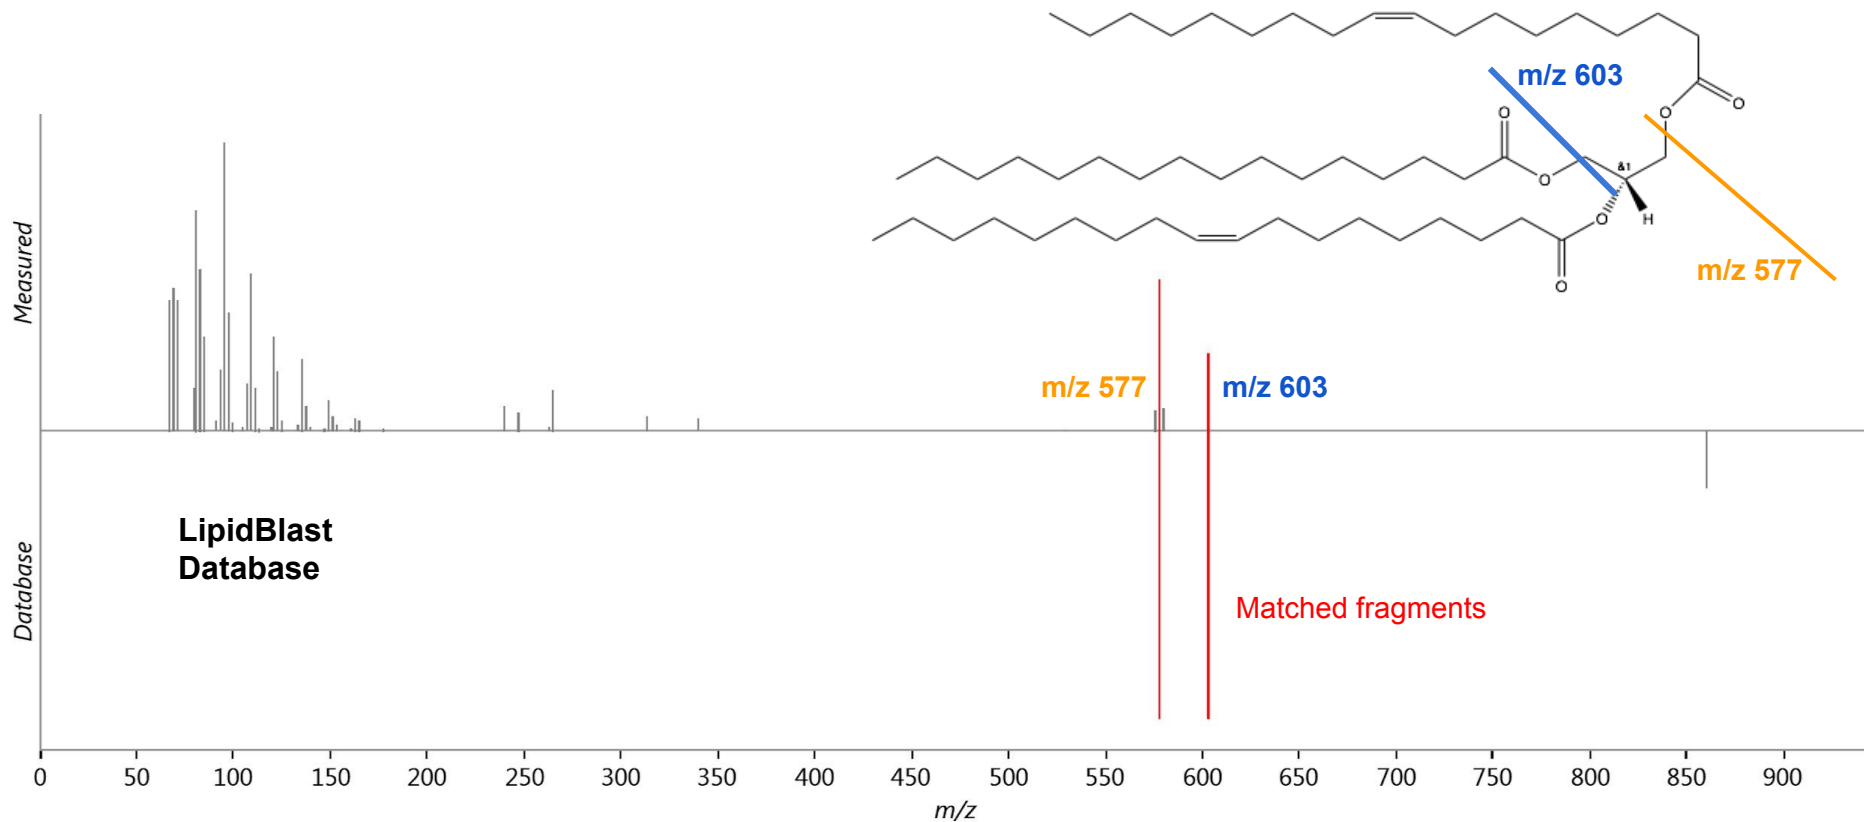

# Identifying fatty acyl chains of TG(52:2) for +NH4

Luca\_lipid\_241117\_Pos\_QC\_4 #7290 RT: 15.54 AV: 1 NL: 5.69E4

F: FTMS + p ESI d Full ms2 876.6539@hcd40.00 [60.6667-910.0000]

83.08460

**METASPACE annotation: C55H102O6, +NH4, m/z 881.7568, TG(52:2)**

**Database used** : EMBL-MCF spectral library and LipidBlast search (in Progenesis software)

**Validated as** : TG(16:0\_18:1\_18:1) using LC-MS/MS method Lipidomics (positive mode)

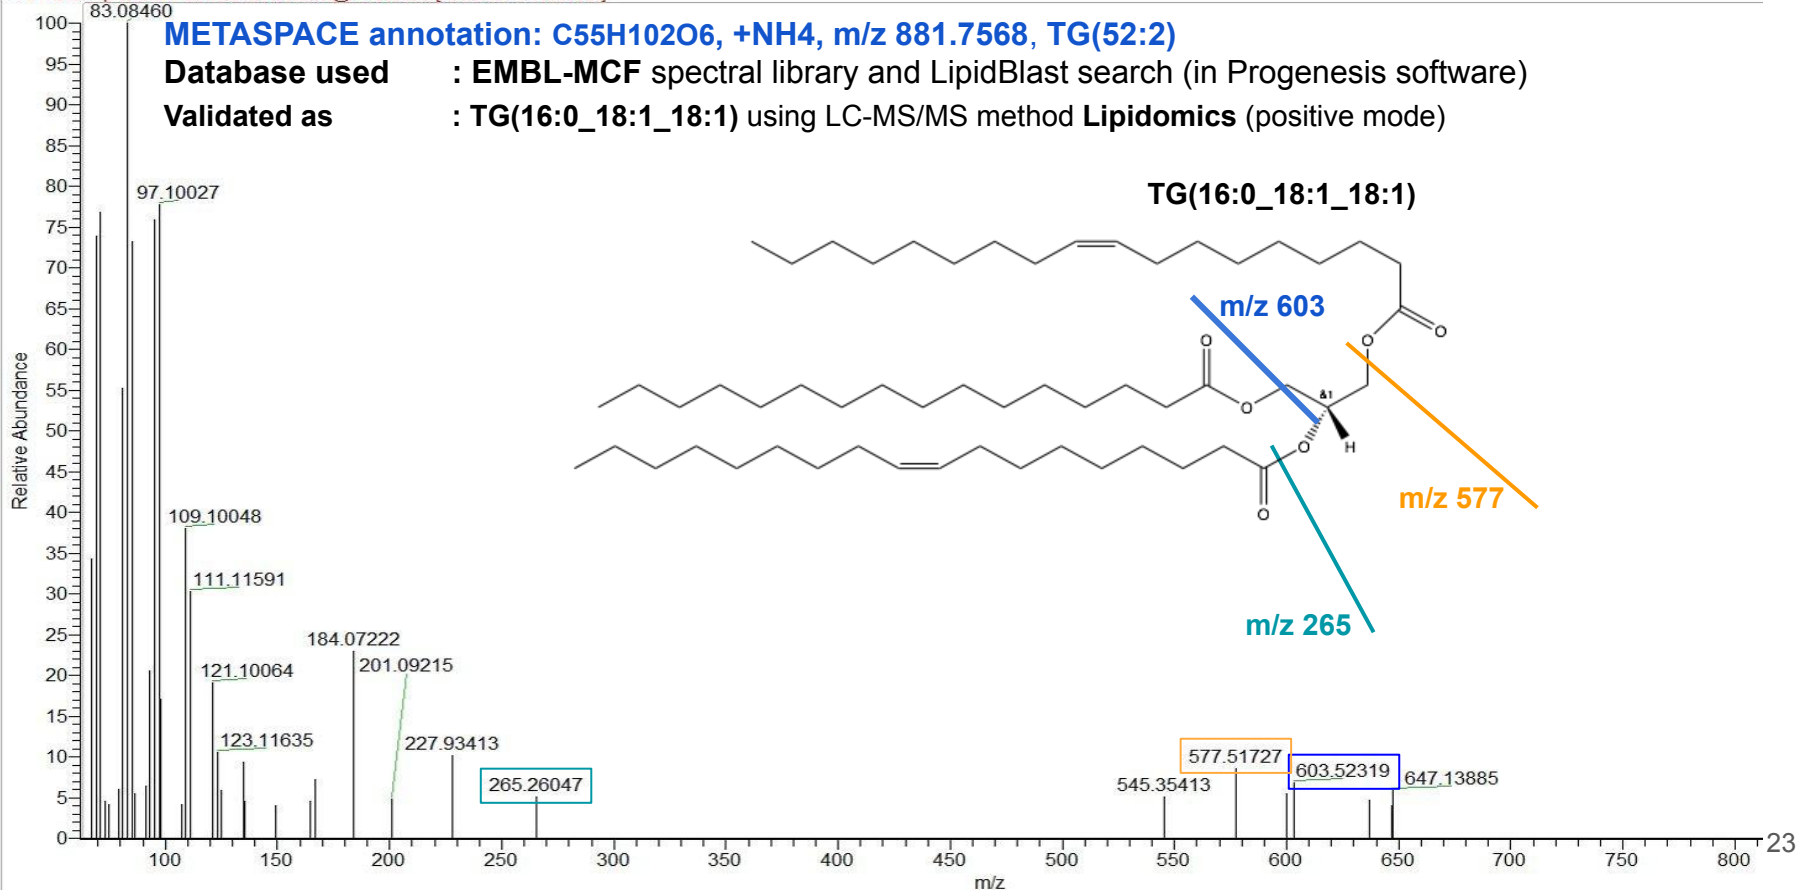

Validation of markers detected in  
*in vivo* murine model of NASH



| <b>Molecular formula</b> | <b>Sample type</b> | <b>METASPACE annotation</b> | <b>Validated using LC-MS/MS as</b> | <b>Validation method</b>   | <b>Summary of the MS/MS validation</b>                                             |
|--------------------------|--------------------|-----------------------------|------------------------------------|----------------------------|------------------------------------------------------------------------------------|
| C53H100O6                | Mouse liver        | TG(50:1)                    | TG(16:0_18:1_16:0)                 | Lipidomics (positive mode) | <b>SL:</b> Metascope Lipidmaps library<br><b>SD:</b> 16:0, 18:1 FA                 |
| C55H102O6                | Mouse liver        | TG(52:2)                    | TG(18:1_18:1_16:0)                 | Lipidomics (positive mode) | <b>SL:</b> Metascope Lipidmaps library<br><b>SD:</b> 16:0, 18:1 FA                 |
| C35H68O5                 | Mouse liver        | DG(32:0)                    | DG(16:0/16:0)                      | Lipidomics (positive mode) | <b>SL:</b> Metascope Lipidmaps library<br><b>SD:</b> 16:0 FA                       |
| C41H78NO8P               | Mouse liver        | PE(36:2) / PC(33:2)         | PE(18:2_18:0)                      | Lipidomics (negative mode) | <b>SL:</b> Metascope Lipidmaps library<br><b>HD:</b> PE<br><b>SD:</b> 18:2 18:0 FA |
| C43H80NO8P               | Mouse liver        | PE(38:3) / PC(35:3)         | PE(20:3_18:0)                      | Lipidomics (negative mode) | <b>SL:</b> Metascope Lipidmaps library<br><b>HD:</b> PE<br><b>SD:</b> 20:3 18:0 FA |
| C42H80NO8P               | Mouse liver        | PE(37:2) / PC(34:2)         | PC(18:2_16:0)                      | Lipidomics (negative mode) | <b>SL:</b> Metascope Lipidmaps library<br><b>HD:</b> PC<br><b>SD:</b> 18:2 16:0 FA |
| C42H82NO8P               | Mouse liver        | PE(37:1) / PC(34:1)         | PC(18:1_16:0)                      | Lipidomics (negative mode) | <b>SL:</b> Metascope Lipidmaps library<br><b>HD:</b> PC<br><b>SD:</b> 18:1 16:0 FA |
| C28H50NO7P               | Mouse liver        | LPE(23:4) / LPC(20:4)       | LPC(20:4)                          | Lipidomics (negative mode) | <b>SL:</b> Metascope Lipidmaps library<br><b>HD:</b> PC<br><b>SD:</b> 20:4 FA      |
| C41H83N2O6P              | Mouse liver        | SM(d36:1)*                  | SM(d36:1)                          | Lipidomics (positive mode) | <b>SL:</b> Metascope Lipidmaps library                                             |

**\* indicates ambiguity due to the existence of structural isomers**

**SL: MS/MS spectral library**  
**HD: Head group MS/MS**  
**SD: Fatty acid (FA) side chain**

In addition to analyzing the samples using data dependent analysis (DDA). A pooled sample was analyzed using the following experiments to obtain fragmentation data.

1. Fragmentation at low energy of all significant TGs (CE = 27). The TGs were added into an inclusion list
2. Fragmentation at low energy of all significant TGs (CE = 40). The TGs were added into an inclusion list
3. A polarity switching experiment of the pool using positive mode mobile phases (Ammonium Formate + Formic Acid)
4. A polarity switching experiment of the pool using negative mode mobile phases (Ammonium Acetate + Acetic Acid)

**METASPACE annotation: C53H100O6, +Na, m/z 855.7412, TG(50:1)**

**Database used** : Metaspace Lipidmaps inbuilt library in Progenesis software

**Validated as** : **TG(16:0\_18:1\_16:0)** using LC-MS/MS method **Lipidomics** (positive mode, m/z 850.7889 [M+NH4]+)

Pool\_PosInd:LowEnergy #3065 RT: 14.28 AV: 1 NL: 7.58E5  
F: FTMS +p ESI d Full ms2 850.7889@hcd27.50 [59.0000-885.0000]

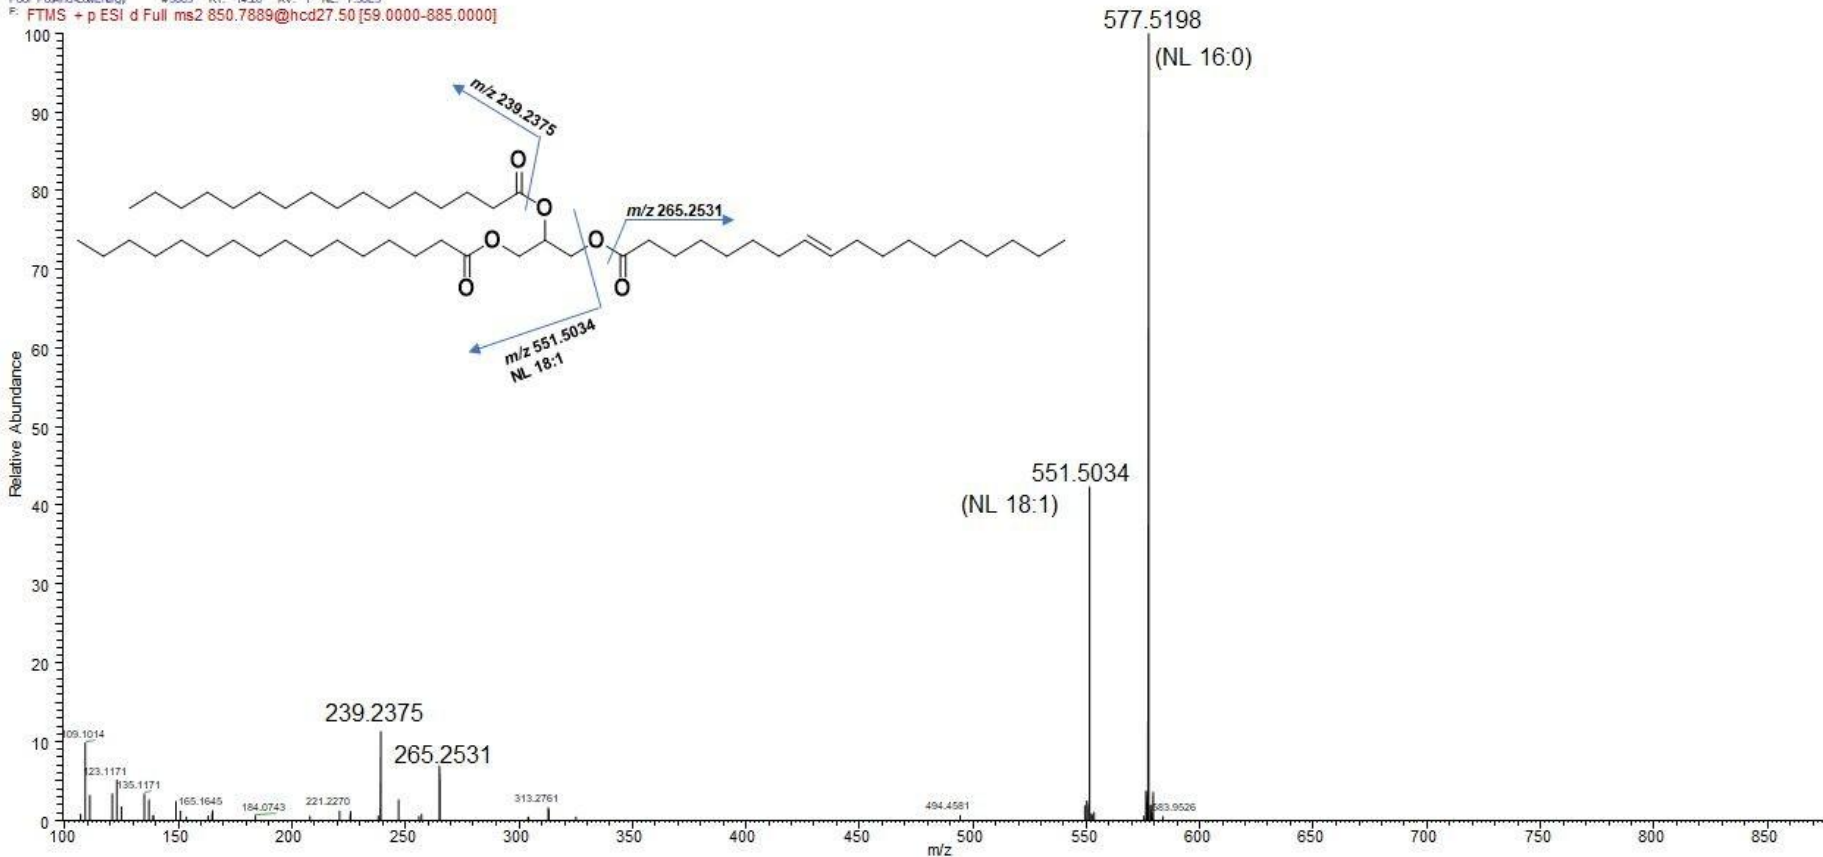

**METASPACE** annotation: C55H102O6, +Na, m/z 881.7568, TG(52:2)

**Database used** : Metascope Lipidmaps inbuilt library in Progenesis software

**Validated as** : TG(18:1\_18:1\_16:0) using LC-MS/MS method Lipidomics (positive mode, m/z 876.7953, [M+NH<sub>4</sub>]<sup>+</sup>)

Pool\_Pos-Incl-LowEnergy #3060 RT: 14.26 AV: 1 NL: 1.94E6

F: FTMS + p ESI d Full ms2 876.7953@hcd27.50 [60.6667-910.0000]

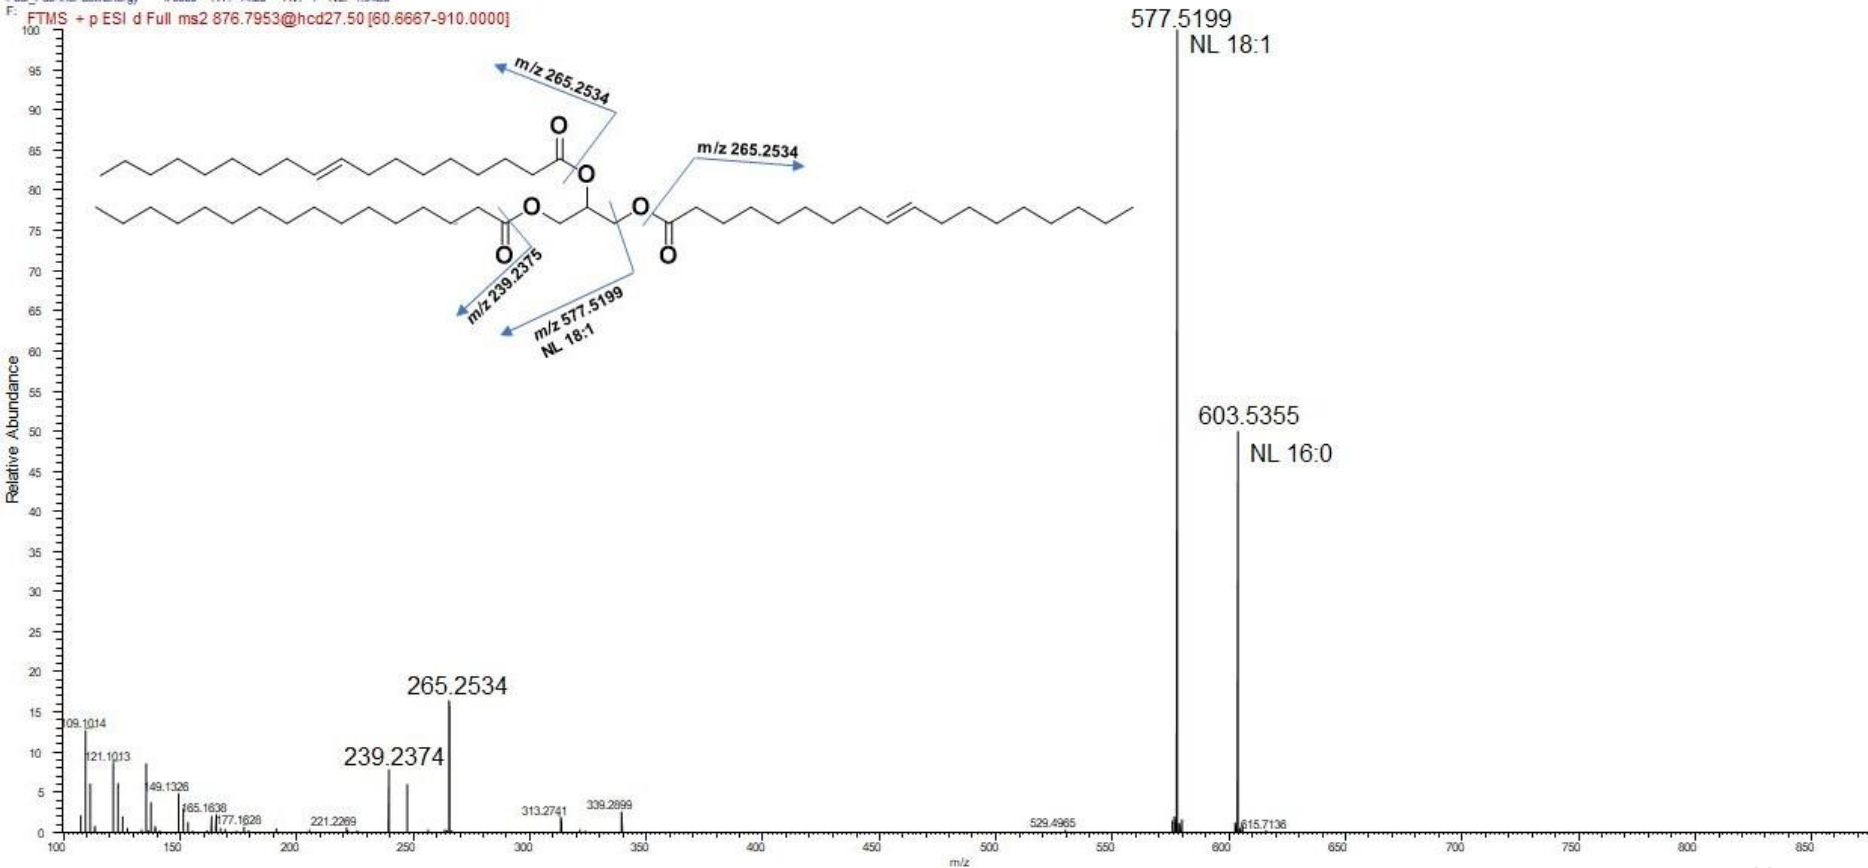

**METASPACE annotation: C35H68O5, +Na, m/z 591.4959, DG(32:0)**

**Database used** : Metascope Lipidmaps inbuilt library in Progenesis software

**Validated as** : **DG(16:0/16:0)** using LC-MS/MS method **Lipidomics** (positive mode, m/z 586.5408, [M+NH4]<sup>+</sup>)

NZ\_1 #4277 RT: 11.28 AV: 1 NL: 5.38E3  
F: FTMS + p ESI d Full ms2 586.5408@hcd40.00 [50.0000-615.0000]

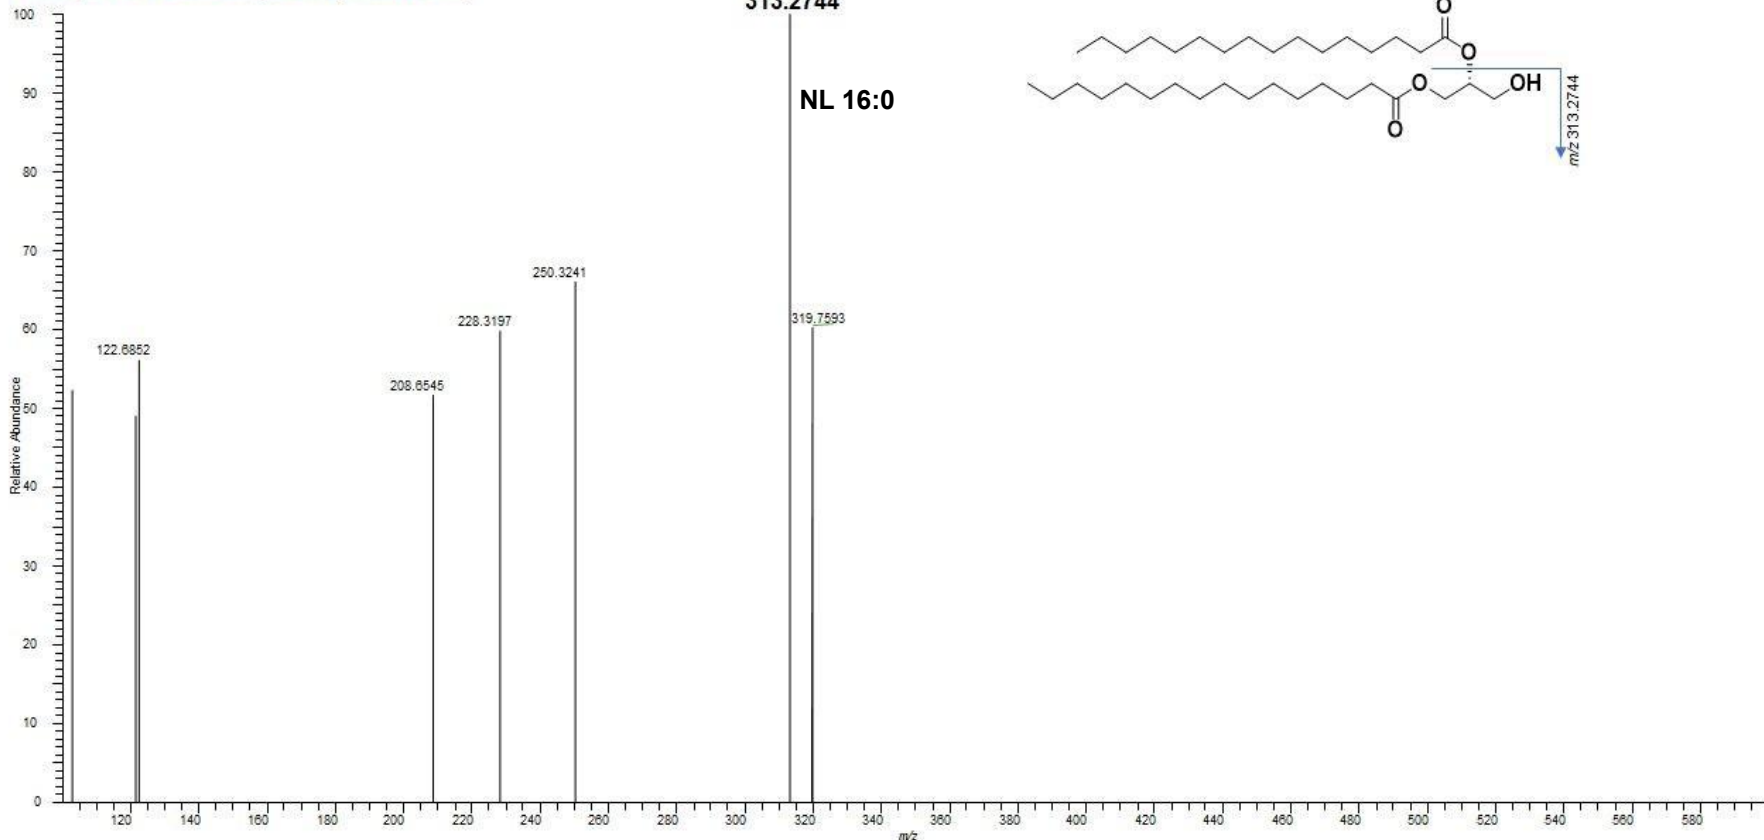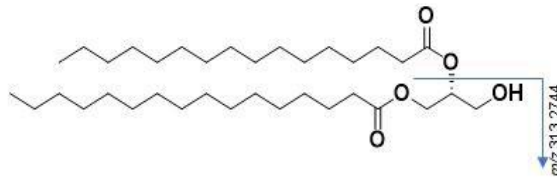

**METASPACE annotation: C41H78NO8P, +H, m/z 744.5537, PE(36:2) or PC(33:2)**

**Database used** : Metascope Lipidmaps inbuilt library in progenesis

**Validated as** : **PE(18:2\_18:0)** using LC-MS/MS method **Lipidomics** (negative mode; m/z 742.5343, [M-H]-)

C3 1 #3622 RT: 10.22 AV: 1 NL: 4.39E4  
F: FTMS - p ESI d Full ms2 742.5346@hcd40.00 [51.6967:775.0000]

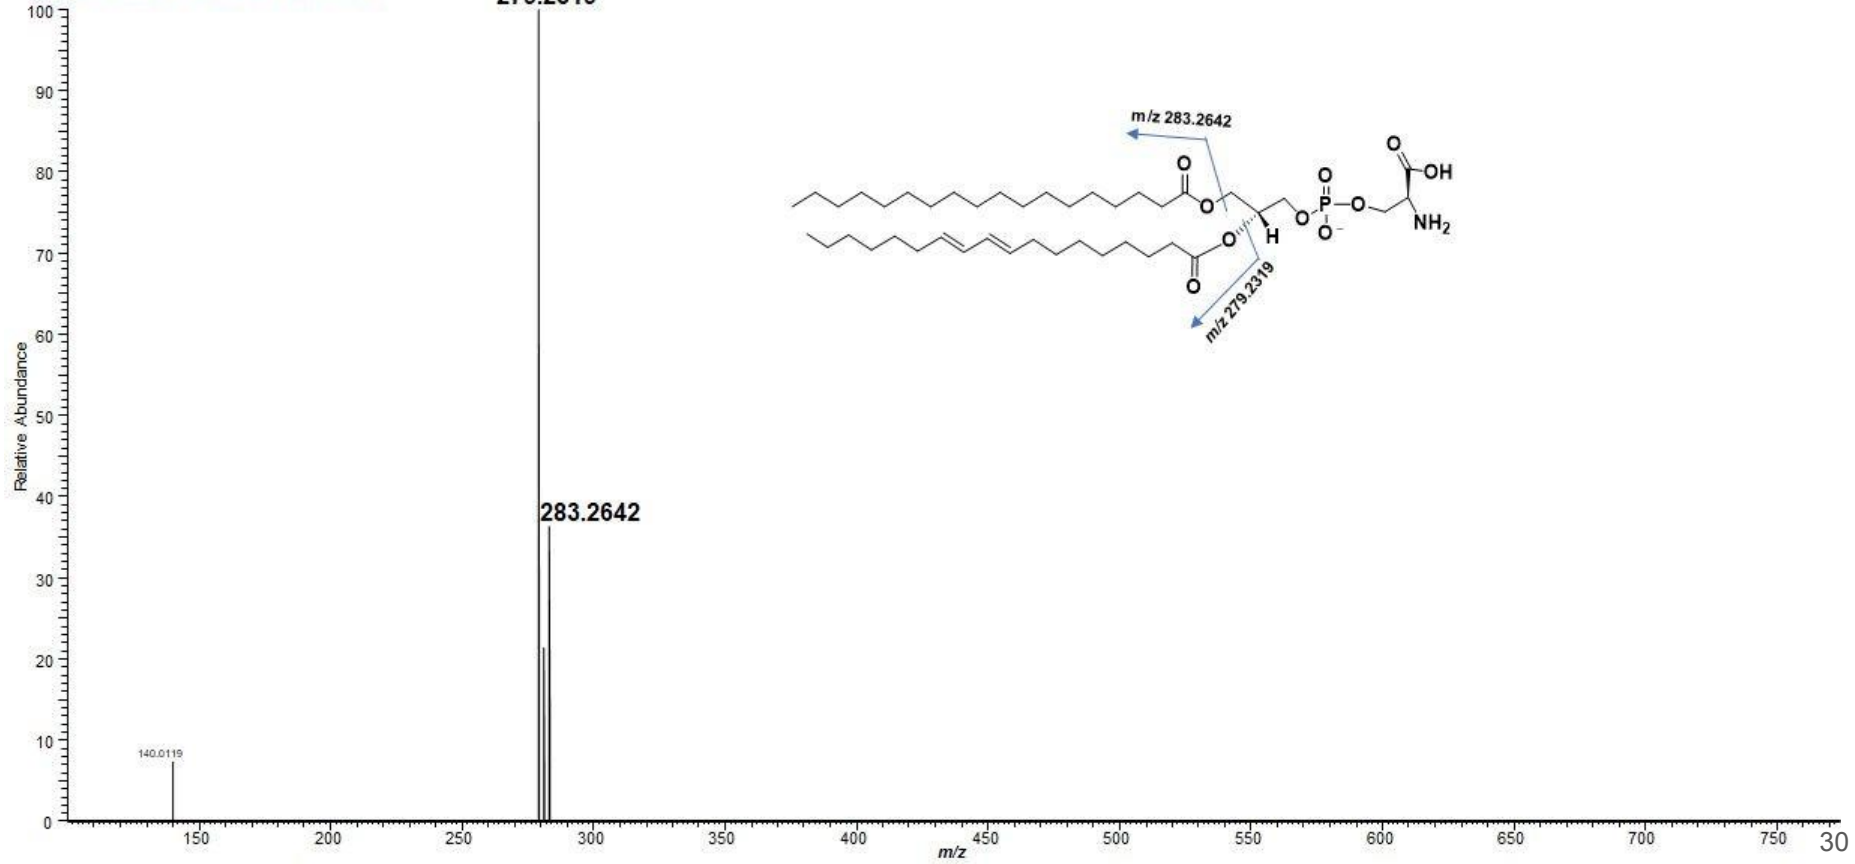

**METASPACE annotation: C43H80NO8P, +H, m/z 770.5694, PE(38:3) or PC(35:3)**

**Database used** : Metascope Lipidmaps inbuilt library in Progenesis software

**Validated as** : **PE(20:3\_18:0)** using LC-MS/MS method **Lipidomics** (negative mode, m/z 768.5518, [M-H]-)

Validated as: PE(20:3\_18:0) using LC-MS/MS method Lipidomics (Negative mode 768.5518, [M-H]-)

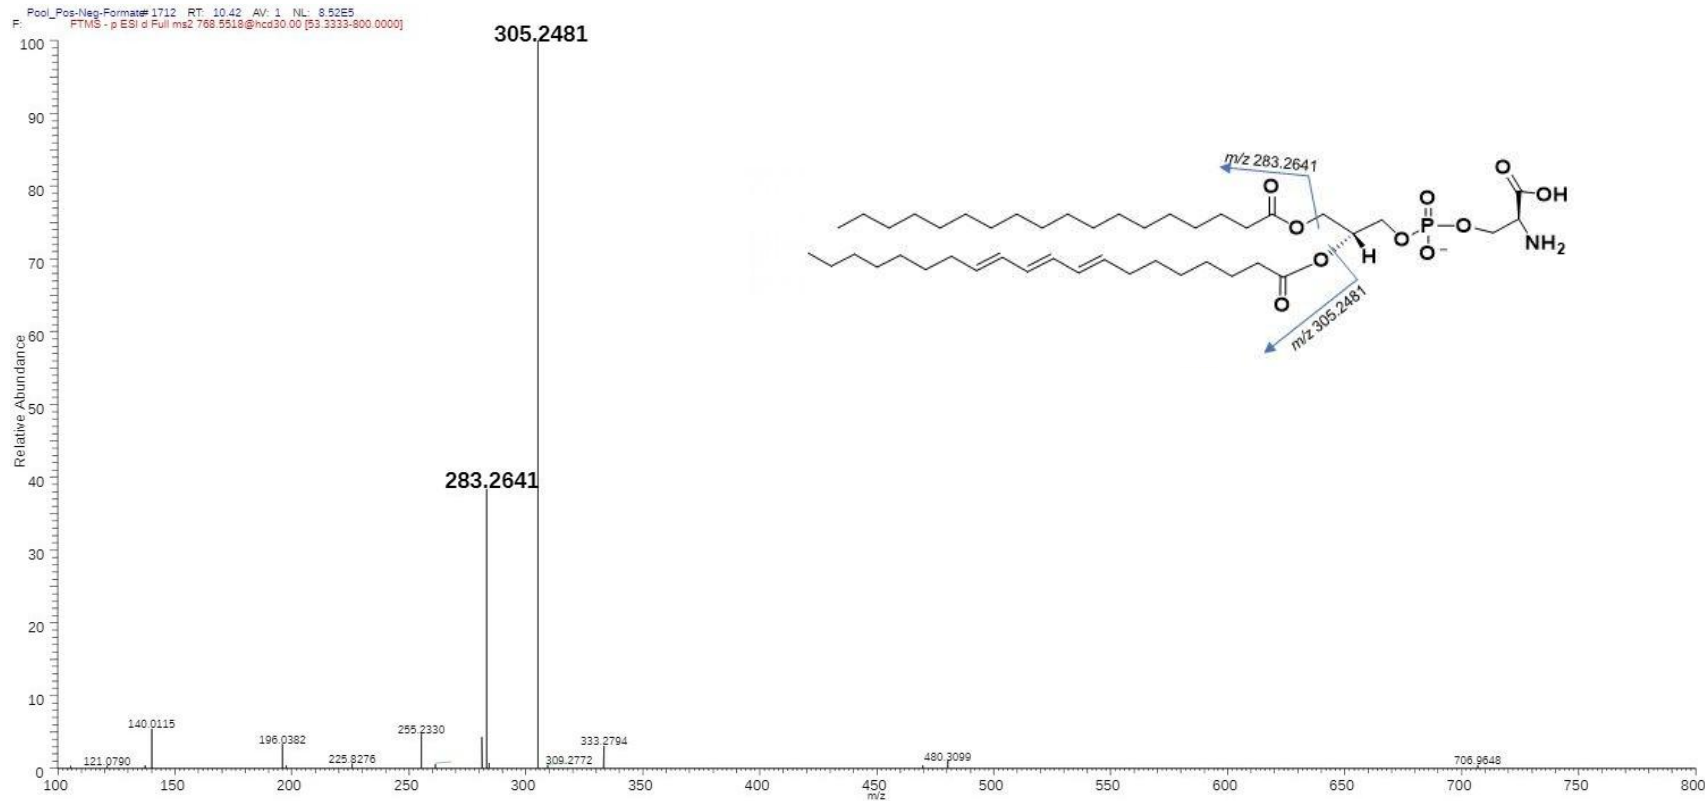

# METASPACE annotation: C42H80NO8P, +Na, m/z 780.5513, PE(37:2) or PC(34:2)

**Database used** : Metascope Lipidmaps inbuilt library in Progenesis software

**Validated as** : PC(18:2\_16:0) using LC-MS/MS method **Lipidomics** (negative mode, m/z 816.5720, [M+Acetate-H]-)

Pool Pos-Neg-Acetate: #2506 RT: 9.77 AV: 1 NL: 1.73E6  
F: FTMS - p ESI d Full ms2 816.5720@hcd30.00 [56.6667-650.0000]

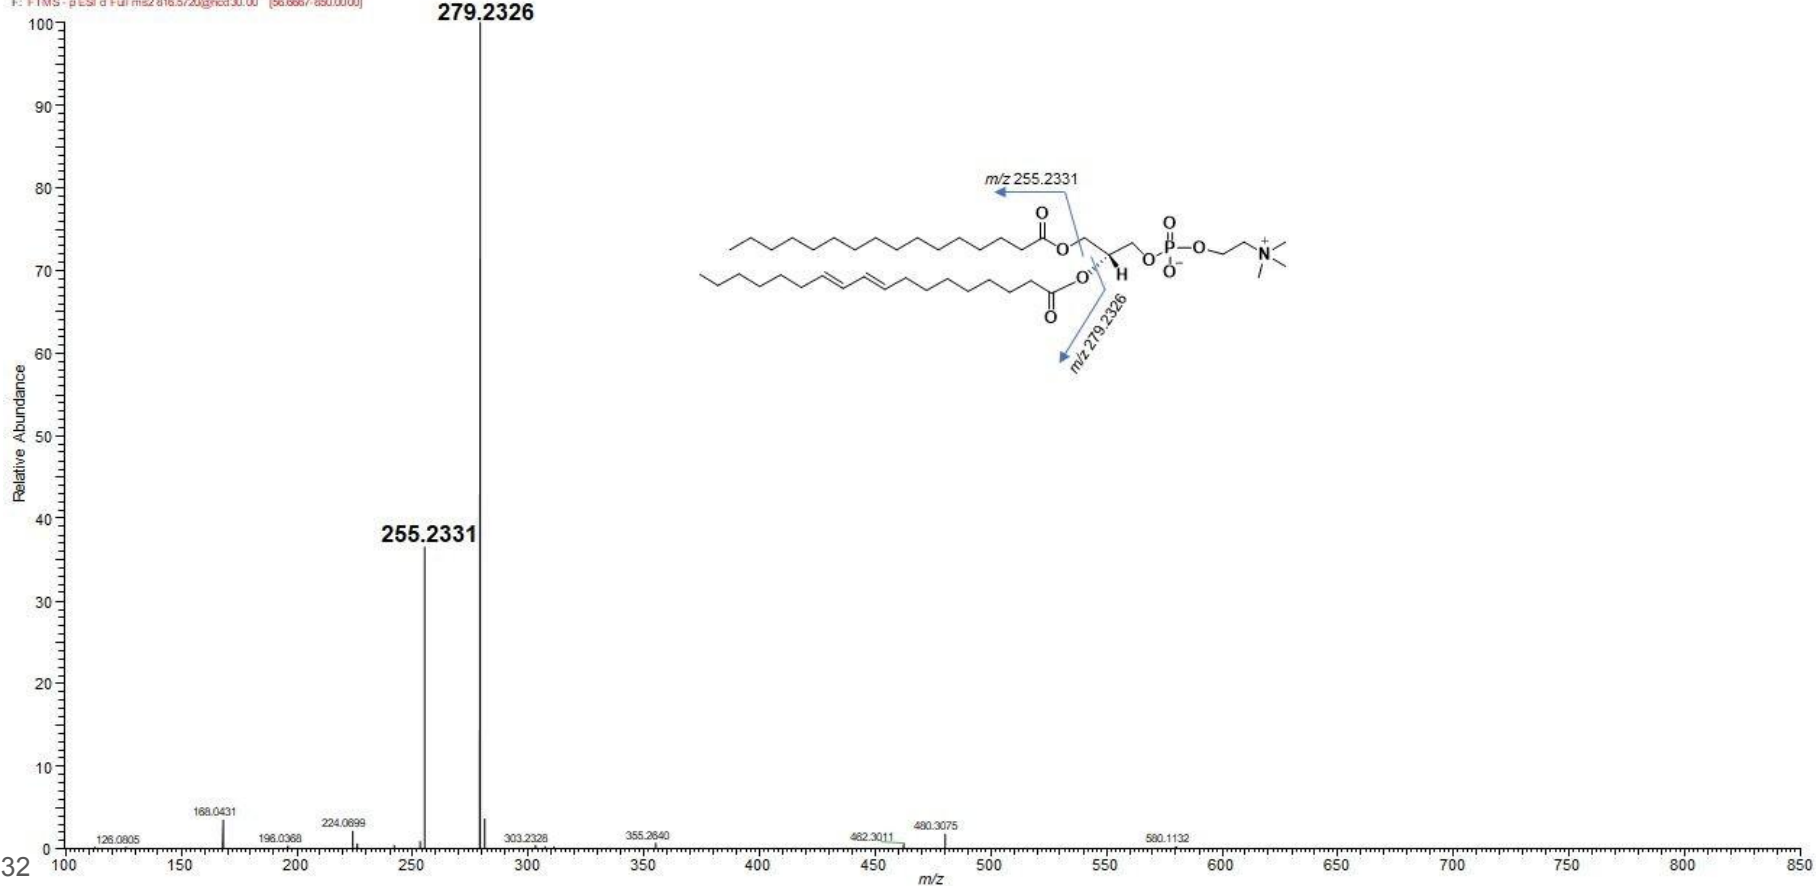



**METASPACE annotation: C42H82NO8P, +H, m/z 760.585, PE(37:1) or PC(34:1)**

**Database used** : Metascope Lipidmaps inbuilt library in Progenesis software

**Validated as** : **PC(18:1\_16:0)** using LC-MS/MS method **Lipidomics** (negative mode, m/z 818.5922, [M+Acetate-H]-)

Peak Pos Neg Acetate #2955 RT: 11.26 AV: 1 NL: 1.21E5  
F: FTMS - p ESI d Full ms2 818.5922@hcd30.00 [57.0000 855.0000]

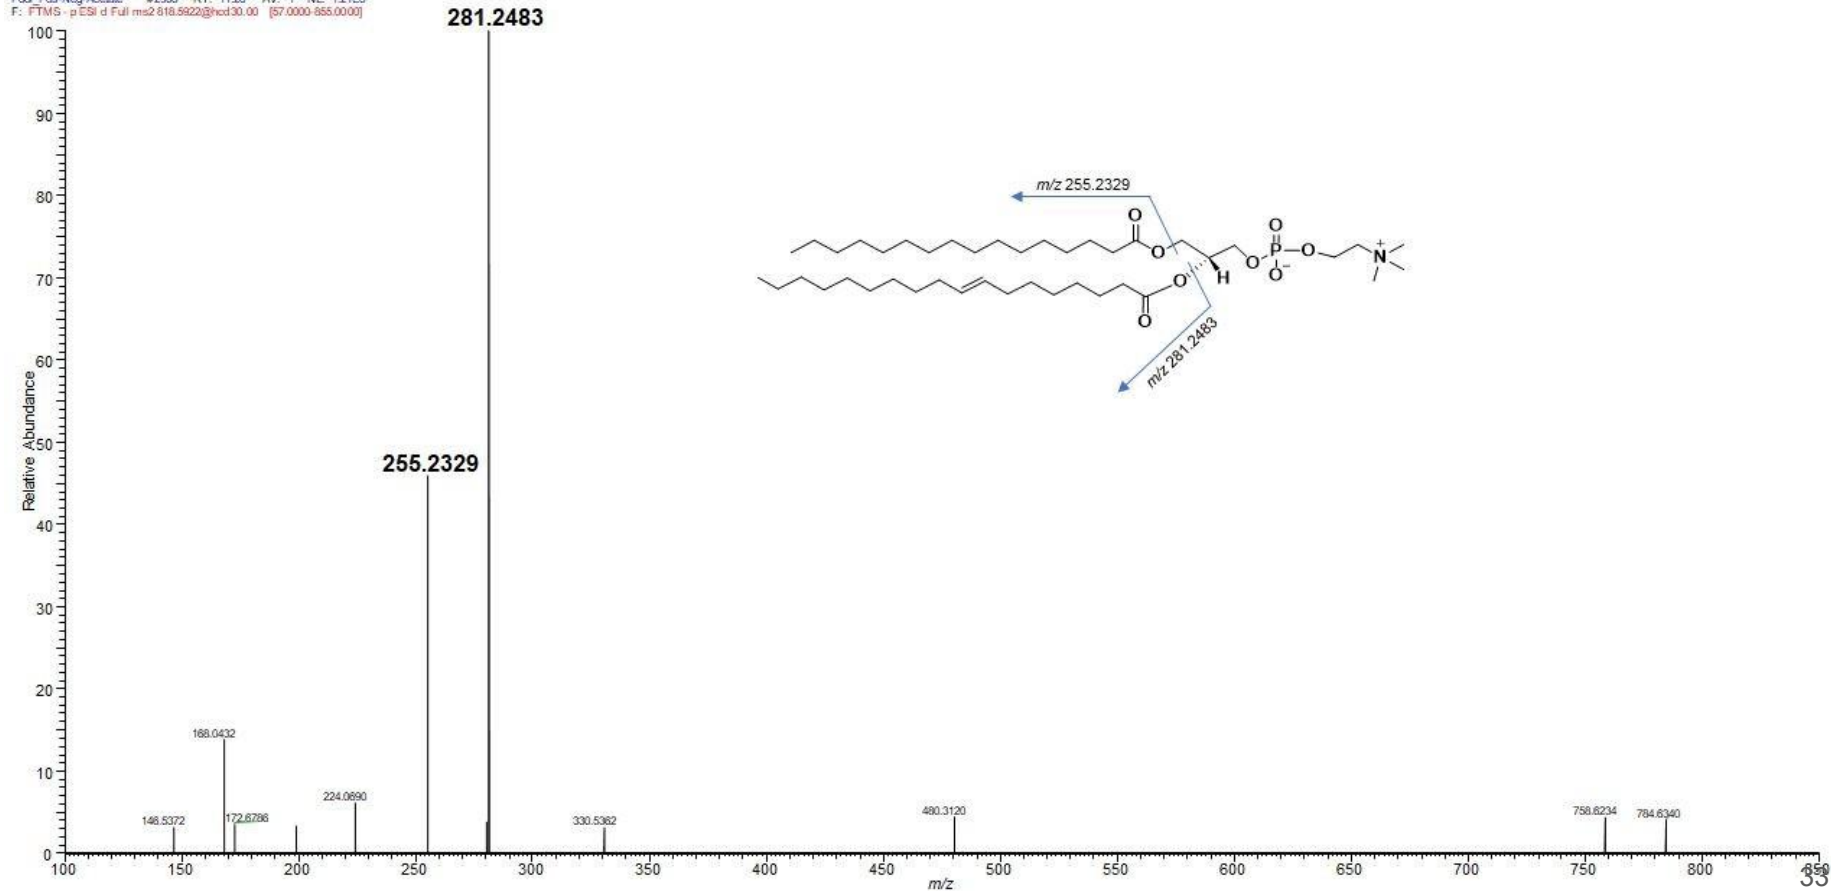

**METASPACE annotation: C28H50NO7P, +H, m/z 544.3397, LPE(23:4) or LPC(20:4)**

**Database used** : Metascope Lipidmaps inbuilt library in Progenesis software

**Validated as** : **LPC(20:4)** using LC-MS/MS method **Lipidomics** (negative mode, m/z 602.3420, [M+Acetate-H]-)

Pool\_Pos-Neg-Acetate#454 RT: 1.79 AV: 1 NL: 4.58E4  
F: FTMS - p ESI d Full ms2 602.3420@hcd30.00 [50.0000-630.0000]

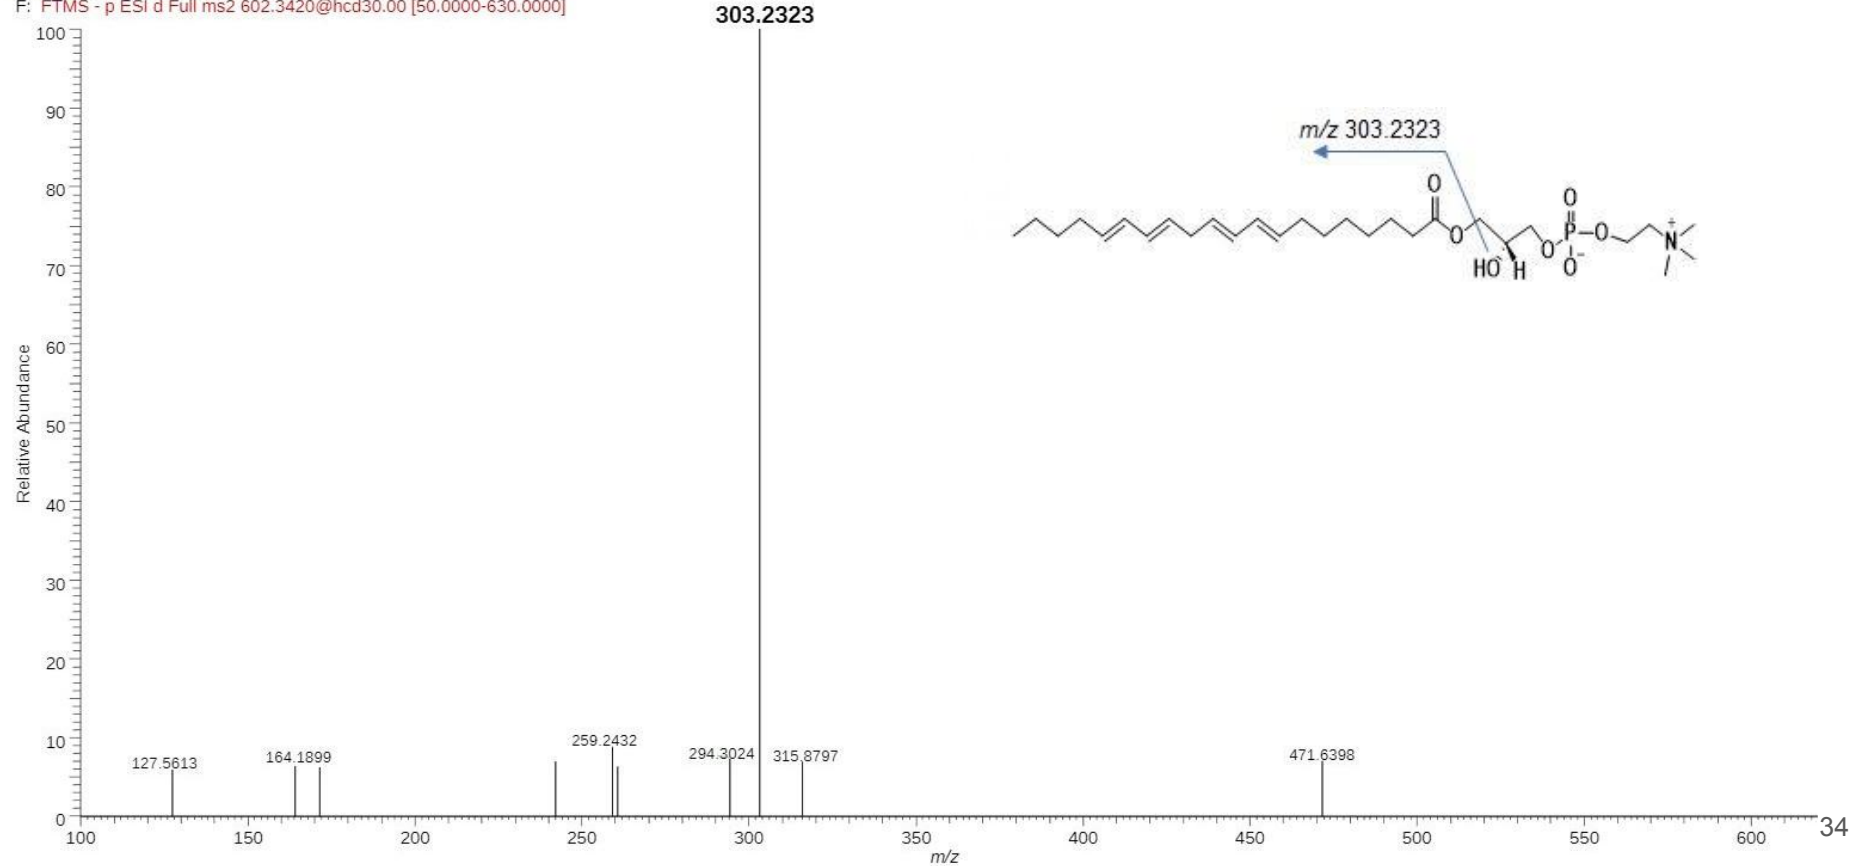

# METASPACE annotation: C41H83N2O6P, +Na, m/z 753.5881, SM(d36:1) or PE-Cer(d39:1)

Database used : Metascope Lipidmaps inbuilt library in Progenesis software

Validated as : **SM(d36:1)** using LC-MS/MS method **Lipidomics** (positive mode, m/z 731.6096, [M+H]<sup>+</sup>

negative mode, m/z 789.6091, [M+Acetate-H]<sup>-</sup>)

Ambiguities exist due to existence of structural isomers.

Can only confirm C:DB composition i.e SM(d36:1)

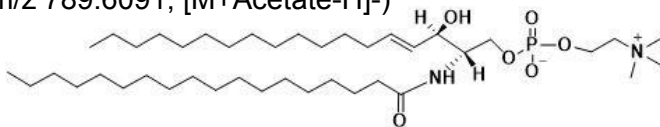

## Pos Ion Mode; [M+H]<sup>+</sup>

Pool\_Pos-Neg-Acetate RT:10.01 NL:3.45E8  
T:FTMS - p ESI Full ms [100.0000-1500.0000]

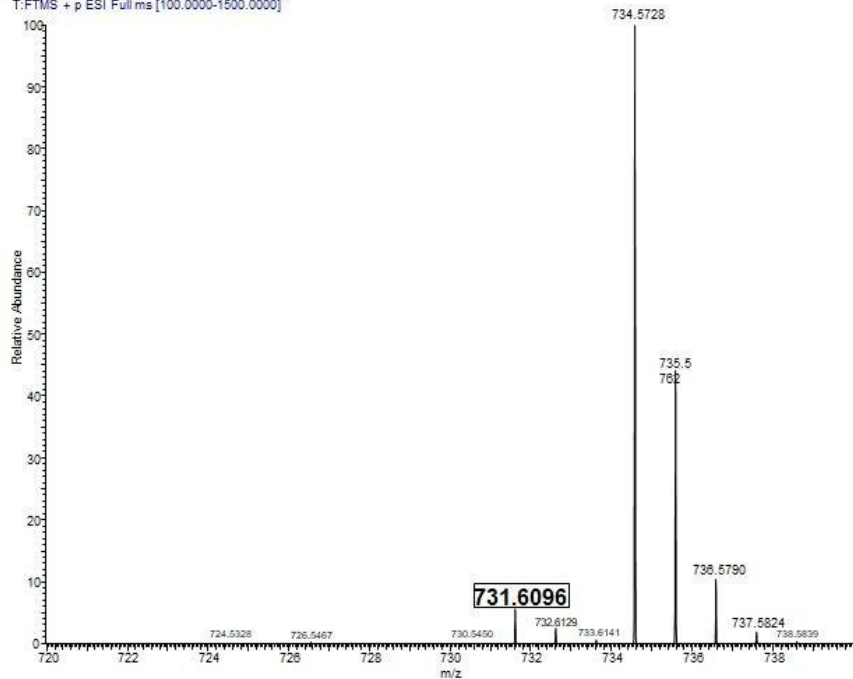

## Neg. Ion Mode; [M+Acetate-H]<sup>-</sup>

Pool\_Pos-Neg-Acetate RT:10.03 NL:5.75E7  
T:FTMS - p ESI Full ms [100.0000-1500.0000]

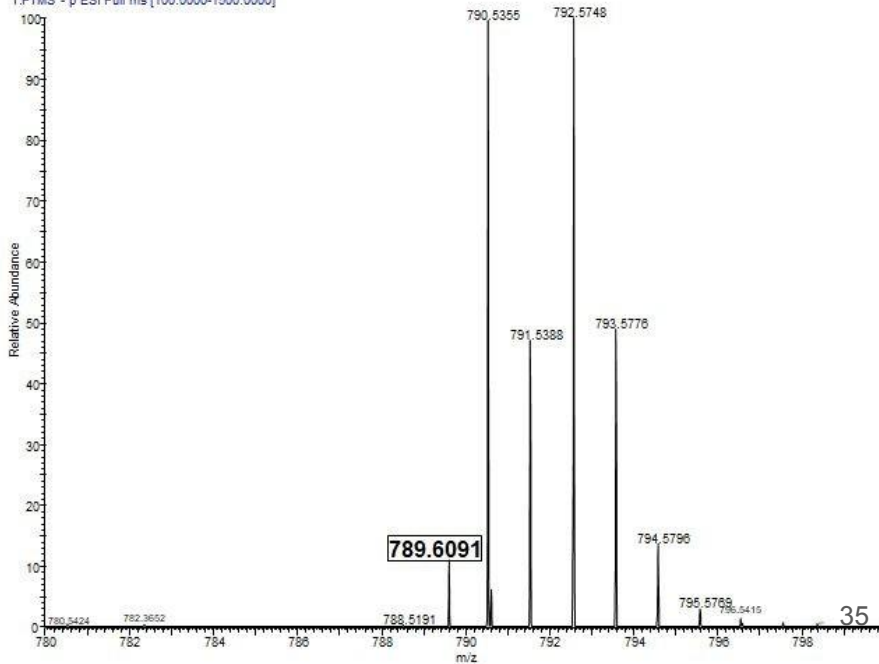

Supplement: EMS126337-supplement-Supplementary_Data_1.pdf [file EMS126337-supplement-Supplementary_Data_1.pdf]
